# Supplementary material
Source: publisher figshare collection journal article supplement (https://acs.figshare.com/ndownloader/files/3761560)
Supplement: Supplementary file 1 [file 3761560]

 
data_1 
 
_audit_creation_method            SHELXL-97 
_chemical_name_systematic 
; 
 ? 
; 
_chemical_name_common             ? 
_chemical_melting_point           ? 
_chemical_formula_moiety
'C29 H35 Cl N O2 Rh'
_chemical_formula_sum 
 'C29 H35 Cl N O2 Rh' 
_chemical_formula_weight          567.94 
 
loop_ 
 _atom_type_symbol 
 _atom_type_description 
 _atom_type_scat_dispersion_real 
 _atom_type_scat_dispersion_imag 
 _atom_type_scat_source 
 'C'  'C'   0.0033   0.0016 
 'International Tables Vol C Tables 4.2.6.8 and 6.1.1.4' 
 'H'  'H'   0.0000   0.0000 
 'International Tables Vol C Tables 4.2.6.8 and 6.1.1.4' 
 'N'  'N'   0.0061   0.0033 
 'International Tables Vol C Tables 4.2.6.8 and 6.1.1.4' 
 'O'  'O'   0.0106   0.0060 
 'International Tables Vol C Tables 4.2.6.8 and 6.1.1.4' 
 'Cl'  'Cl'   0.1484   0.1585 
 'International Tables Vol C Tables 4.2.6.8 and 6.1.1.4' 
 'Rh'  'Rh'  -1.1178   0.9187 
 'International Tables Vol C Tables 4.2.6.8 and 6.1.1.4' 
 
_symmetry_cell_setting            'Triclinic' 
_symmetry_space_group_name_H-M    'P -1'
_symmetry_space_group_name_Hall   '-P 1'
  
loop_ 
 _symmetry_equiv_pos_as_xyz 
 'x, y, z' 
 '-x, -y, -z' 
 
_cell_length_a                    8.5769(12) 
_cell_length_b                    11.8151(16) 
_cell_length_c                    14.119(2) 
_cell_angle_alpha                 98.924(6) 
_cell_angle_beta                  99.556(6) 
_cell_angle_gamma                 101.077(6) 
_cell_volume                      1358.5(3) 
_cell_formula_units_Z             2 
_cell_measurement_temperature     296(2) 
_cell_measurement_reflns_used     9895 
_cell_measurement_theta_min       2.54 
_cell_measurement_theta_max       27.39 
 
_exptl_crystal_description        'Rectangular' 
_exptl_crystal_colour             'brown' 
_exptl_crystal_size_max           0.12 
_exptl_crystal_size_mid           0.08 
_exptl_crystal_size_min           0.06 
_exptl_crystal_density_meas       ? 
_exptl_crystal_density_diffrn     1.388 
_exptl_crystal_density_method     'not measured' 
_exptl_crystal_F_000              588 
_exptl_absorpt_coefficient_mu     0.752 
_exptl_absorpt_correction_type    'Multi-scan' 
_exptl_absorpt_correction_T_min   0.6511 
_exptl_absorpt_correction_T_max   0.7456  
_exptl_absorpt_process_details    
'SADABS-2008/1 - Bruker AXS area detector scaling and absorption correction'  
 
_exptl_special_details 
; 
 ? 
; 
 
_diffrn_ambient_temperature       296(2) 
_diffrn_radiation_wavelength      0.71073 
_diffrn_radiation_type            MoK\a 
_diffrn_radiation_source          'fine-focus sealed tube' 
_diffrn_radiation_monochromator   graphite 
_diffrn_measurement_device_type   'Bruker APEX-II CCD' 
_diffrn_measurement_method        '\f and \w scans' 
_diffrn_detector_area_resol_mean  ? 
_diffrn_standards_number          ? 
_diffrn_standards_interval_count  ? 
_diffrn_standards_interval_time   ? 
_diffrn_standards_decay_%         ? 
_diffrn_reflns_number             23073 
_diffrn_reflns_av_R_equivalents   0.0299 
_diffrn_reflns_av_sigmaI/netI     0.0279 
_diffrn_reflns_limit_h_min        -11 
_diffrn_reflns_limit_h_max        10 
_diffrn_reflns_limit_k_min        -13 
_diffrn_reflns_limit_k_max        15 
_diffrn_reflns_limit_l_min        -18 
_diffrn_reflns_limit_l_max        16 
_diffrn_reflns_theta_min          1.49 
_diffrn_reflns_theta_max          27.72 
_reflns_number_total              6382 
_reflns_number_gt                 5493 
_reflns_threshold_expression      >2sigma(I) 
 
_computing_data_collection        'Bruker APEX2' 
_computing_cell_refinement        'Bruker SAINT' 
_computing_data_reduction         'Bruker SAINT' 
_computing_structure_solution     'Sir-92 (Altomare et al., 1993)' 
_computing_structure_refinement   'SHELXL-97 (Sheldrick, 2008)' 
_computing_molecular_graphics     'Bruker SHELXTL' 
_computing_publication_material   'Bruker SHELXTL' 
 
_refine_special_details 
; 
 Refinement of F^2^ against ALL reflections.  The weighted R-factor wR and 
 goodness of fit S are based on F^2^, conventional R-factors R are based 
 on F, with F set to zero for negative F^2^. The threshold expression of 
 F^2^ > 2sigma(F^2^) is used only for calculating R-factors(gt) etc. and is 
 not relevant to the choice of reflections for refinement.  R-factors based 
 on F^2^ are statistically about twice as large as those based on F, and R- 
 factors based on ALL data will be even larger. 
; 
 
_refine_ls_structure_factor_coef  Fsqd  
_refine_ls_matrix_type            full 
_refine_ls_weighting_scheme       calc  
_refine_ls_weighting_details 
 'calc w=1/[\s^2^(Fo^2^)+(0.0492P)^2^+0.5028P] where P=(Fo^2^+2Fc^2^)/3' 
_atom_sites_solution_primary      direct 
_atom_sites_solution_secondary    difmap 
_atom_sites_solution_hydrogens    geom 
_refine_ls_hydrogen_treatment     none 
_refine_ls_extinction_method      none 
_refine_ls_extinction_coef        ? 
_refine_ls_number_reflns          6382 
_refine_ls_number_parameters      316 
_refine_ls_number_restraints      0 
_refine_ls_R_factor_all           0.0405 
_refine_ls_R_factor_gt            0.0331 
_refine_ls_wR_factor_ref          0.0916 
_refine_ls_wR_factor_gt           0.0860 
_refine_ls_goodness_of_fit_ref    1.056 
_refine_ls_restrained_S_all       1.056 
_refine_ls_shift/su_max           0.001 
_refine_ls_shift/su_mean          0.000 
 
loop_ 
 _atom_site_label 
 _atom_site_type_symbol 
 _atom_site_fract_x 
 _atom_site_fract_y 
 _atom_site_fract_z 
 _atom_site_U_iso_or_equiv 
 _atom_site_adp_type 
 _atom_site_occupancy 
 _atom_site_symmetry_multiplicity 
 _atom_site_calc_flag 
 _atom_site_refinement_flags 
 _atom_site_disorder_assembly 
 _atom_site_disorder_group 
C1 C 0.4613(3) 0.1971(2) 0.14570(19) 0.0501(6) Uani 1 1 d . . . 
C2 C 0.3313(3) 0.1316(2) 0.1731(2) 0.0550(6) Uani 1 1 d . . . 
C3 C 0.3083(3) 0.1972(3) 0.2628(2) 0.0568(7) Uani 1 1 d . . . 
C4 C 0.1845(5) 0.1525(4) 0.3207(3) 0.0947(12) Uani 1 1 d . . . 
H4A H 0.2109 0.0859 0.3455 0.142 Uiso 1 1 calc R . . 
H4B H 0.0787 0.1296 0.2790 0.142 Uiso 1 1 calc R . . 
H4C H 0.1851 0.2135 0.3743 0.142 Uiso 1 1 calc R . . 
C5 C 0.4300(3) 0.3029(3) 0.29060(18) 0.0531(6) Uani 1 1 d . . . 
C6 C 0.4678(5) 0.3894(4) 0.3852(2) 0.0866(11) Uani 1 1 d . . . 
H6A H 0.3728 0.3846 0.4133 0.130 Uiso 1 1 calc R . . 
H6B H 0.5016 0.4674 0.3734 0.130 Uiso 1 1 calc R . . 
H6C H 0.5534 0.3718 0.4297 0.130 Uiso 1 1 calc R . . 
C7 C 0.5210(3) 0.3063(2) 0.21457(19) 0.0484(6) Uani 1 1 d . . . 
C8 C 0.6740(4) 0.3941(3) 0.2166(3) 0.0816(10) Uani 1 1 d . . . 
H8A H 0.6757 0.4668 0.2584 0.122 Uiso 1 1 calc R . . 
H8B H 0.6780 0.4072 0.1515 0.122 Uiso 1 1 calc R . . 
H8C H 0.7662 0.3644 0.2412 0.122 Uiso 1 1 calc R . . 
C9 C 0.2310(5) 0.0124(3) 0.1213(3) 0.0889(11) Uani 1 1 d . . . 
H9A H 0.2507 -0.0040 0.0561 0.133 Uiso 1 1 calc R . . 
H9B H 0.1181 0.0115 0.1182 0.133 Uiso 1 1 calc R . . 
H9C H 0.2602 -0.0463 0.1564 0.133 Uiso 1 1 calc R . . 
C10 C 0.5369(4) 0.1629(4) 0.0601(2) 0.0797(10) Uani 1 1 d . . . 
H10A H 0.6280 0.1303 0.0813 0.119 Uiso 1 1 calc R . . 
H10B H 0.5727 0.2311 0.0335 0.119 Uiso 1 1 calc R . . 
H10C H 0.4584 0.1054 0.0108 0.119 Uiso 1 1 calc R . . 
C11 C 0.2162(3) 0.4636(2) 0.18839(19) 0.0483(6) Uani 1 1 d . . . 
C12 C 0.1821(3) 0.5156(3) 0.2755(2) 0.0573(7) Uani 1 1 d . . . 
H12 H 0.1874 0.4774 0.3283 0.069 Uiso 1 1 calc R . . 
C13 C 0.1397(4) 0.6252(3) 0.2846(2) 0.0669(8) Uani 1 1 d . . . 
C14 C 0.1253(4) 0.6821(3) 0.2059(3) 0.0745(9) Uani 1 1 d . . . 
H14 H 0.0965 0.7545 0.2129 0.089 Uiso 1 1 calc R . . 
C15 C 0.1531(4) 0.6327(3) 0.1181(2) 0.0655(8) Uani 1 1 d . . . 
H15 H 0.1429 0.6702 0.0649 0.079 Uiso 1 1 calc R . . 
C16 C 0.1977(3) 0.5238(2) 0.1100(2) 0.0522(6) Uani 1 1 d . . . 
C17 C 0.2210(3) 0.4618(3) 0.0195(2) 0.0540(6) Uani 1 1 d . . . 
H17 H 0.2086 0.4924 -0.0374 0.065 Uiso 1 1 calc R . . 
C18 C 0.2813(3) 0.2950(3) -0.06774(18) 0.0508(6) Uani 1 1 d . . . 
C19 C 0.2026(4) 0.1796(3) -0.0974(2) 0.0593(7) Uani 1 1 d . . . 
H19 H 0.1362 0.1441 -0.0595 0.071 Uiso 1 1 calc R . . 
C20 C 0.2216(4) 0.1152(3) -0.1842(2) 0.0643(8) Uani 1 1 d . . . 
H20 H 0.1672 0.0368 -0.2038 0.077 Uiso 1 1 calc R . . 
C21 C 0.3204(3) 0.1660(3) -0.24238(19) 0.0576(7) Uani 1 1 d . . . 
C22 C 0.3388(4) 0.0947(4) -0.3389(2) 0.0739(9) Uani 1 1 d . . . 
C23 C 0.4301(14) 0.0062(10) -0.3187(4) 0.311(8) Uani 1 1 d . . . 
H23A H 0.3698 -0.0492 -0.2877 0.467 Uiso 1 1 calc R . . 
H23B H 0.5326 0.0436 -0.2761 0.467 Uiso 1 1 calc R . . 
H23C H 0.4483 -0.0341 -0.3789 0.467 Uiso 1 1 calc R . . 
C24 C 0.1786(6) 0.0431(6) -0.4043(3) 0.130(2) Uani 1 1 d . . . 
H24A H 0.1935 0.0022 -0.4653 0.195 Uiso 1 1 calc R . . 
H24B H 0.1236 0.1046 -0.4162 0.195 Uiso 1 1 calc R . . 
H24C H 0.1149 -0.0110 -0.3738 0.195 Uiso 1 1 calc R . . 
C25 C 0.4284(11) 0.1722(7) -0.3979(5) 0.233(6) Uani 1 1 d . . . 
H25A H 0.5429 0.1880 -0.3722 0.349 Uiso 1 1 calc R . . 
H25B H 0.3932 0.2449 -0.3938 0.349 Uiso 1 1 calc R . . 
H25C H 0.4058 0.1327 -0.4651 0.349 Uiso 1 1 calc R . . 
C26 C 0.4028(4) 0.2816(3) -0.2086(2) 0.0658(8) Uani 1 1 d . . . 
H26 H 0.4723 0.3169 -0.2450 0.079 Uiso 1 1 calc R . . 
C27 C 0.3849(4) 0.3459(3) -0.1229(2) 0.0600(7) Uani 1 1 d . . . 
H27 H 0.4422 0.4235 -0.1018 0.072 Uiso 1 1 calc R . . 
C28 C 0.1091(5) 0.6833(4) 0.3778(3) 0.0920(12) Uani 1 1 d . . . 
C29 C 0.0738(9) 0.6690(6) 0.5377(4) 0.161(3) Uani 1 1 d . . . 
H29A H 0.1525 0.7413 0.5646 0.242 Uiso 1 1 calc R . . 
H29B H 0.0807 0.6157 0.5822 0.242 Uiso 1 1 calc R . . 
H29C H -0.0329 0.6846 0.5275 0.242 Uiso 1 1 calc R . . 
N1 N 0.2599(2) 0.3613(2) 0.02044(15) 0.0476(5) Uani 1 1 d . . . 
O1 O 0.1058(5) 0.6172(3) 0.4451(2) 0.1164(11) Uani 1 1 d . . . 
O2 O 0.0965(6) 0.7840(3) 0.3928(3) 0.1580(18) Uani 1 1 d . . . 
Cl1 Cl -0.01653(8) 0.22562(7) 0.10746(6) 0.06430(19) Uani 1 1 d . . . 
Rh1 Rh 0.27047(2) 0.303829(16) 0.153577(13) 0.04073(8) Uani 1 1 d . . . 
 
loop_ 
 _atom_site_aniso_label 
 _atom_site_aniso_U_11 
 _atom_site_aniso_U_22 
 _atom_site_aniso_U_33 
 _atom_site_aniso_U_23 
 _atom_site_aniso_U_13 
 _atom_site_aniso_U_12 
C1 0.0469(13) 0.0559(15) 0.0481(13) 0.0019(11) 0.0072(11) 0.0219(12) 
C2 0.0546(15) 0.0475(14) 0.0613(16) 0.0081(12) 0.0035(12) 0.0163(12) 
C3 0.0490(14) 0.0729(18) 0.0559(15) 0.0239(14) 0.0144(12) 0.0188(13) 
C4 0.078(2) 0.138(4) 0.087(2) 0.059(3) 0.033(2) 0.024(2) 
C5 0.0561(15) 0.0648(16) 0.0413(13) 0.0032(11) 0.0055(11) 0.0296(13) 
C6 0.090(2) 0.111(3) 0.0508(17) -0.0170(18) -0.0065(16) 0.047(2) 
C7 0.0409(12) 0.0514(14) 0.0537(14) 0.0095(11) 0.0061(11) 0.0161(11) 
C8 0.0540(18) 0.076(2) 0.112(3) 0.029(2) 0.0102(18) 0.0056(16) 
C9 0.091(3) 0.0517(18) 0.107(3) 0.0061(18) -0.007(2) 0.0061(17) 
C10 0.0647(19) 0.118(3) 0.0622(19) -0.0037(19) 0.0173(15) 0.047(2) 
C11 0.0410(12) 0.0489(14) 0.0537(14) 0.0038(11) 0.0064(11) 0.0151(11) 
C12 0.0613(16) 0.0573(16) 0.0597(16) 0.0064(13) 0.0161(13) 0.0290(13) 
C13 0.0634(18) 0.0631(18) 0.075(2) -0.0027(15) 0.0121(15) 0.0307(15) 
C14 0.074(2) 0.0595(18) 0.089(2) 0.0043(17) 0.0002(17) 0.0339(16) 
C15 0.0633(18) 0.0569(17) 0.075(2) 0.0178(15) -0.0002(15) 0.0190(14) 
C16 0.0432(13) 0.0533(15) 0.0563(15) 0.0081(12) 0.0015(11) 0.0109(11) 
C17 0.0484(14) 0.0608(16) 0.0500(14) 0.0157(12) 0.0030(11) 0.0077(12) 
C18 0.0461(13) 0.0632(16) 0.0384(12) 0.0049(11) 0.0029(10) 0.0095(12) 
C19 0.0553(16) 0.0697(18) 0.0466(14) 0.0049(13) 0.0115(12) 0.0029(14) 
C20 0.0616(17) 0.0666(18) 0.0521(16) -0.0031(14) 0.0066(13) -0.0004(14) 
C21 0.0480(14) 0.0780(19) 0.0408(13) 0.0011(13) 0.0041(11) 0.0124(14) 
C22 0.0655(19) 0.106(3) 0.0465(15) -0.0021(16) 0.0096(14) 0.0254(18) 
C23 0.463(16) 0.484(17) 0.076(3) -0.017(6) -0.002(6) 0.427(15) 
C24 0.103(3) 0.180(5) 0.075(3) -0.052(3) -0.005(2) 0.039(3) 
C25 0.286(10) 0.230(8) 0.105(4) -0.071(5) 0.124(6) -0.118(8) 
C26 0.0625(18) 0.081(2) 0.0515(15) 0.0107(15) 0.0180(13) 0.0052(16) 
C27 0.0580(16) 0.0645(17) 0.0514(15) 0.0067(13) 0.0137(13) 0.0007(14) 
C28 0.108(3) 0.088(3) 0.090(3) -0.004(2) 0.027(2) 0.058(2) 
C29 0.248(8) 0.155(5) 0.120(4) 0.006(4) 0.108(5) 0.095(5) 
N1 0.0423(11) 0.0575(13) 0.0396(10) 0.0055(9) 0.0058(8) 0.0080(9) 
O1 0.181(3) 0.093(2) 0.103(2) 0.0061(17) 0.082(2) 0.064(2) 
O2 0.260(5) 0.119(3) 0.131(3) 0.002(2) 0.065(3) 0.124(3) 
Cl1 0.0387(3) 0.0792(5) 0.0726(5) 0.0110(4) 0.0103(3) 0.0112(3) 
Rh1 0.03834(11) 0.04554(12) 0.03906(11) 0.00383(8) 0.00900(7) 0.01367(8) 
 
_geom_special_details 
; 
 All esds (except the esd in the dihedral angle between two l.s. planes) 
 are estimated using the full covariance matrix.  The cell esds are taken 
 into account individually in the estimation of esds in distances, angles 
 and torsion angles; correlations between esds in cell parameters are only 
 used when they are defined by crystal symmetry.  An approximate (isotropic) 
 treatment of cell esds is used for estimating esds involving l.s. planes. 
; 
 
loop_ 
 _geom_bond_atom_site_label_1 
 _geom_bond_atom_site_label_2 
 _geom_bond_distance 
 _geom_bond_site_symmetry_2 
 _geom_bond_publ_flag 
C1 C2 1.377(4) . ? 
C1 C7 1.437(4) . ? 
C1 C10 1.502(4) . ? 
C1 Rh1 2.257(2) . ? 
C2 C3 1.441(4) . ? 
C2 C9 1.505(4) . ? 
C2 Rh1 2.241(3) . ? 
C3 C5 1.419(4) . ? 
C3 C4 1.511(4) . ? 
C3 Rh1 2.159(3) . ? 
C4 H4A 0.9600 . ? 
C4 H4B 0.9600 . ? 
C4 H4C 0.9600 . ? 
C5 C7 1.429(4) . ? 
C5 C6 1.497(4) . ? 
C5 Rh1 2.179(3) . ? 
C6 H6A 0.9600 . ? 
C6 H6B 0.9600 . ? 
C6 H6C 0.9600 . ? 
C7 C8 1.502(4) . ? 
C7 Rh1 2.171(2) . ? 
C8 H8A 0.9600 . ? 
C8 H8B 0.9600 . ? 
C8 H8C 0.9600 . ? 
C9 H9A 0.9600 . ? 
C9 H9B 0.9600 . ? 
C9 H9C 0.9600 . ? 
C10 H10A 0.9600 . ? 
C10 H10B 0.9600 . ? 
C10 H10C 0.9600 . ? 
C11 C12 1.389(4) . ? 
C11 C16 1.409(4) . ? 
C11 Rh1 2.037(2) . ? 
C12 C13 1.403(4) . ? 
C12 H12 0.9300 . ? 
C13 C14 1.386(5) . ? 
C13 C28 1.475(5) . ? 
C14 C15 1.364(5) . ? 
C14 H14 0.9300 . ? 
C15 C16 1.404(4) . ? 
C15 H15 0.9300 . ? 
C16 C17 1.435(4) . ? 
C17 N1 1.295(4) . ? 
C17 H17 0.9300 . ? 
C18 C19 1.366(4) . ? 
C18 C27 1.388(4) . ? 
C18 N1 1.423(3) . ? 
C19 C20 1.390(4) . ? 
C19 H19 0.9300 . ? 
C20 C21 1.394(4) . ? 
C20 H20 0.9300 . ? 
C21 C26 1.381(4) . ? 
C21 C22 1.535(4) . ? 
C22 C23 1.458(7) . ? 
C22 C24 1.481(5) . ? 
C22 C25 1.517(7) . ? 
C23 H23A 0.9600 . ? 
C23 H23B 0.9600 . ? 
C23 H23C 0.9600 . ? 
C24 H24A 0.9600 . ? 
C24 H24B 0.9600 . ? 
C24 H24C 0.9600 . ? 
C25 H25A 0.9600 . ? 
C25 H25B 0.9600 . ? 
C25 H25C 0.9600 . ? 
C26 C27 1.374(4) . ? 
C26 H26 0.9300 . ? 
C27 H27 0.9300 . ? 
C28 O2 1.205(5) . ? 
C28 O1 1.322(5) . ? 
C29 O1 1.446(5) . ? 
C29 H29A 0.9600 . ? 
C29 H29B 0.9600 . ? 
C29 H29C 0.9600 . ? 
N1 Rh1 2.089(2) . ? 
Cl1 Rh1 2.3967(8) . ? 
 
loop_ 
 _geom_angle_atom_site_label_1 
 _geom_angle_atom_site_label_2 
 _geom_angle_atom_site_label_3 
 _geom_angle 
 _geom_angle_site_symmetry_1 
 _geom_angle_site_symmetry_3 
 _geom_angle_publ_flag 
C2 C1 C7 109.3(2) . . ? 
C2 C1 C10 127.4(3) . . ? 
C7 C1 C10 123.3(3) . . ? 
C2 C1 Rh1 71.56(15) . . ? 
C7 C1 Rh1 67.87(13) . . ? 
C10 C1 Rh1 128.0(2) . . ? 
C1 C2 C3 107.6(2) . . ? 
C1 C2 C9 127.1(3) . . ? 
C3 C2 C9 125.3(3) . . ? 
C1 C2 Rh1 72.79(15) . . ? 
C3 C2 Rh1 67.83(15) . . ? 
C9 C2 Rh1 125.3(2) . . ? 
C5 C3 C2 108.6(2) . . ? 
C5 C3 C4 126.8(3) . . ? 
C2 C3 C4 124.3(3) . . ? 
C5 C3 Rh1 71.67(15) . . ? 
C2 C3 Rh1 73.98(15) . . ? 
C4 C3 Rh1 125.0(2) . . ? 
C3 C4 H4A 109.5 . . ? 
C3 C4 H4B 109.5 . . ? 
H4A C4 H4B 109.5 . . ? 
C3 C4 H4C 109.5 . . ? 
H4A C4 H4C 109.5 . . ? 
H4B C4 H4C 109.5 . . ? 
C3 C5 C7 106.9(2) . . ? 
C3 C5 C6 127.2(3) . . ? 
C7 C5 C6 125.7(3) . . ? 
C3 C5 Rh1 70.14(15) . . ? 
C7 C5 Rh1 70.52(14) . . ? 
C6 C5 Rh1 128.6(2) . . ? 
C5 C6 H6A 109.5 . . ? 
C5 C6 H6B 109.5 . . ? 
H6A C6 H6B 109.5 . . ? 
C5 C6 H6C 109.5 . . ? 
H6A C6 H6C 109.5 . . ? 
H6B C6 H6C 109.5 . . ? 
C5 C7 C1 107.4(2) . . ? 
C5 C7 C8 126.4(3) . . ? 
C1 C7 C8 124.9(3) . . ? 
C5 C7 Rh1 71.13(14) . . ? 
C1 C7 Rh1 74.32(14) . . ? 
C8 C7 Rh1 130.2(2) . . ? 
C7 C8 H8A 109.5 . . ? 
C7 C8 H8B 109.5 . . ? 
H8A C8 H8B 109.5 . . ? 
C7 C8 H8C 109.5 . . ? 
H8A C8 H8C 109.5 . . ? 
H8B C8 H8C 109.5 . . ? 
C2 C9 H9A 109.5 . . ? 
C2 C9 H9B 109.5 . . ? 
H9A C9 H9B 109.5 . . ? 
C2 C9 H9C 109.5 . . ? 
H9A C9 H9C 109.5 . . ? 
H9B C9 H9C 109.5 . . ? 
C1 C10 H10A 109.5 . . ? 
C1 C10 H10B 109.5 . . ? 
H10A C10 H10B 109.5 . . ? 
C1 C10 H10C 109.5 . . ? 
H10A C10 H10C 109.5 . . ? 
H10B C10 H10C 109.5 . . ? 
C12 C11 C16 116.4(2) . . ? 
C12 C11 Rh1 128.8(2) . . ? 
C16 C11 Rh1 114.51(19) . . ? 
C11 C12 C13 120.8(3) . . ? 
C11 C12 H12 119.6 . . ? 
C13 C12 H12 119.6 . . ? 
C14 C13 C12 120.8(3) . . ? 
C14 C13 C28 117.9(3) . . ? 
C12 C13 C28 121.3(3) . . ? 
C15 C14 C13 120.4(3) . . ? 
C15 C14 H14 119.8 . . ? 
C13 C14 H14 119.8 . . ? 
C14 C15 C16 118.5(3) . . ? 
C14 C15 H15 120.8 . . ? 
C16 C15 H15 120.8 . . ? 
C15 C16 C11 123.1(3) . . ? 
C15 C16 C17 122.6(3) . . ? 
C11 C16 C17 114.2(2) . . ? 
N1 C17 C16 117.2(2) . . ? 
N1 C17 H17 121.4 . . ? 
C16 C17 H17 121.4 . . ? 
C19 C18 C27 119.5(3) . . ? 
C19 C18 N1 120.0(2) . . ? 
C27 C18 N1 120.5(3) . . ? 
C18 C19 C20 120.0(3) . . ? 
C18 C19 H19 120.0 . . ? 
C20 C19 H19 120.0 . . ? 
C19 C20 C21 121.3(3) . . ? 
C19 C20 H20 119.4 . . ? 
C21 C20 H20 119.4 . . ? 
C26 C21 C20 117.3(3) . . ? 
C26 C21 C22 121.8(3) . . ? 
C20 C21 C22 120.9(3) . . ? 
C23 C22 C24 112.4(6) . . ? 
C23 C22 C25 107.9(7) . . ? 
C24 C22 C25 103.7(5) . . ? 
C23 C22 C21 109.8(3) . . ? 
C24 C22 C21 111.0(3) . . ? 
C25 C22 C21 111.7(4) . . ? 
C22 C23 H23A 109.5 . . ? 
C22 C23 H23B 109.5 . . ? 
H23A C23 H23B 109.5 . . ? 
C22 C23 H23C 109.5 . . ? 
H23A C23 H23C 109.5 . . ? 
H23B C23 H23C 109.5 . . ? 
C22 C24 H24A 109.5 . . ? 
C22 C24 H24B 109.5 . . ? 
H24A C24 H24B 109.5 . . ? 
C22 C24 H24C 109.5 . . ? 
H24A C24 H24C 109.5 . . ? 
H24B C24 H24C 109.5 . . ? 
C22 C25 H25A 109.5 . . ? 
C22 C25 H25B 109.5 . . ? 
H25A C25 H25B 109.5 . . ? 
C22 C25 H25C 109.5 . . ? 
H25A C25 H25C 109.5 . . ? 
H25B C25 H25C 109.5 . . ? 
C27 C26 C21 121.8(3) . . ? 
C27 C26 H26 119.1 . . ? 
C21 C26 H26 119.1 . . ? 
C26 C27 C18 120.0(3) . . ? 
C26 C27 H27 120.0 . . ? 
C18 C27 H27 120.0 . . ? 
O2 C28 O1 122.9(4) . . ? 
O2 C28 C13 123.0(5) . . ? 
O1 C28 C13 114.0(3) . . ? 
O1 C29 H29A 109.5 . . ? 
O1 C29 H29B 109.5 . . ? 
H29A C29 H29B 109.5 . . ? 
O1 C29 H29C 109.5 . . ? 
H29A C29 H29C 109.5 . . ? 
H29B C29 H29C 109.5 . . ? 
C17 N1 C18 119.5(2) . . ? 
C17 N1 Rh1 115.58(18) . . ? 
C18 N1 Rh1 124.77(17) . . ? 
C28 O1 C29 116.4(4) . . ? 
C11 Rh1 N1 78.41(10) . . ? 
C11 Rh1 C3 121.00(11) . . ? 
N1 Rh1 C3 160.47(10) . . ? 
C11 Rh1 C7 112.08(10) . . ? 
N1 Rh1 C7 108.95(9) . . ? 
C3 Rh1 C7 63.78(10) . . ? 
C11 Rh1 C5 99.50(10) . . ? 
N1 Rh1 C5 144.31(10) . . ? 
C3 Rh1 C5 38.19(11) . . ? 
C7 Rh1 C5 38.35(10) . . ? 
C11 Rh1 C2 159.18(11) . . ? 
N1 Rh1 C2 122.37(10) . . ? 
C3 Rh1 C2 38.19(11) . . ? 
C7 Rh1 C2 62.66(10) . . ? 
C5 Rh1 C2 63.38(10) . . ? 
C11 Rh1 C1 148.47(10) . . ? 
N1 Rh1 C1 100.74(9) . . ? 
C3 Rh1 C1 61.96(10) . . ? 
C7 Rh1 C1 37.80(10) . . ? 
C5 Rh1 C1 62.74(9) . . ? 
C2 Rh1 C1 35.65(10) . . ? 
C11 Rh1 Cl1 86.45(7) . . ? 
N1 Rh1 Cl1 88.32(6) . . ? 
C3 Rh1 Cl1 94.62(8) . . ? 
C7 Rh1 Cl1 156.47(8) . . ? 
C5 Rh1 Cl1 127.31(8) . . ? 
C2 Rh1 Cl1 94.81(8) . . ? 
C1 Rh1 Cl1 125.08(7) . . ? 
 
loop_ 
 _geom_torsion_atom_site_label_1 
 _geom_torsion_atom_site_label_2 
 _geom_torsion_atom_site_label_3 
 _geom_torsion_atom_site_label_4 
 _geom_torsion 
 _geom_torsion_site_symmetry_1 
 _geom_torsion_site_symmetry_2 
 _geom_torsion_site_symmetry_3 
 _geom_torsion_site_symmetry_4 
 _geom_torsion_publ_flag 
C7 C1 C2 C3 -1.7(3) . . . . ? 
C10 C1 C2 C3 176.6(3) . . . . ? 
Rh1 C1 C2 C3 -59.16(18) . . . . ? 
C7 C1 C2 C9 179.2(3) . . . . ? 
C10 C1 C2 C9 -2.5(5) . . . . ? 
Rh1 C1 C2 C9 121.7(3) . . . . ? 
C7 C1 C2 Rh1 57.50(18) . . . . ? 
C10 C1 C2 Rh1 -124.2(3) . . . . ? 
C1 C2 C3 C5 -1.5(3) . . . . ? 
C9 C2 C3 C5 177.7(3) . . . . ? 
Rh1 C2 C3 C5 -63.79(18) . . . . ? 
C1 C2 C3 C4 -175.9(3) . . . . ? 
C9 C2 C3 C4 3.3(5) . . . . ? 
Rh1 C2 C3 C4 121.8(3) . . . . ? 
C1 C2 C3 Rh1 62.33(19) . . . . ? 
C9 C2 C3 Rh1 -118.5(3) . . . . ? 
C2 C3 C5 C7 4.0(3) . . . . ? 
C4 C3 C5 C7 178.2(3) . . . . ? 
Rh1 C3 C5 C7 -61.32(17) . . . . ? 
C2 C3 C5 C6 -170.7(3) . . . . ? 
C4 C3 C5 C6 3.5(5) . . . . ? 
Rh1 C3 C5 C6 124.0(3) . . . . ? 
C2 C3 C5 Rh1 65.30(19) . . . . ? 
C4 C3 C5 Rh1 -120.5(3) . . . . ? 
C3 C5 C7 C1 -4.9(3) . . . . ? 
C6 C5 C7 C1 169.9(3) . . . . ? 
Rh1 C5 C7 C1 -65.99(17) . . . . ? 
C3 C5 C7 C8 -172.4(3) . . . . ? 
C6 C5 C7 C8 2.4(4) . . . . ? 
Rh1 C5 C7 C8 126.5(3) . . . . ? 
C3 C5 C7 Rh1 61.07(17) . . . . ? 
C6 C5 C7 Rh1 -124.1(3) . . . . ? 
C2 C1 C7 C5 4.1(3) . . . . ? 
C10 C1 C7 C5 -174.2(3) . . . . ? 
Rh1 C1 C7 C5 63.87(16) . . . . ? 
C2 C1 C7 C8 171.9(3) . . . . ? 
C10 C1 C7 C8 -6.5(4) . . . . ? 
Rh1 C1 C7 C8 -128.4(3) . . . . ? 
C2 C1 C7 Rh1 -59.73(19) . . . . ? 
C10 C1 C7 Rh1 121.9(3) . . . . ? 
C16 C11 C12 C13 -3.2(4) . . . . ? 
Rh1 C11 C12 C13 -177.0(2) . . . . ? 
C11 C12 C13 C14 2.3(5) . . . . ? 
C11 C12 C13 C28 -177.7(3) . . . . ? 
C12 C13 C14 C15 -0.4(5) . . . . ? 
C28 C13 C14 C15 179.6(3) . . . . ? 
C13 C14 C15 C16 -0.5(5) . . . . ? 
C14 C15 C16 C11 -0.5(4) . . . . ? 
C14 C15 C16 C17 176.6(3) . . . . ? 
C12 C11 C16 C15 2.3(4) . . . . ? 
Rh1 C11 C16 C15 177.1(2) . . . . ? 
C12 C11 C16 C17 -175.0(2) . . . . ? 
Rh1 C11 C16 C17 -0.2(3) . . . . ? 
C15 C16 C17 N1 -179.1(3) . . . . ? 
C11 C16 C17 N1 -1.8(4) . . . . ? 
C27 C18 C19 C20 -2.5(4) . . . . ? 
N1 C18 C19 C20 179.1(3) . . . . ? 
C18 C19 C20 C21 0.1(5) . . . . ? 
C19 C20 C21 C26 2.1(5) . . . . ? 
C19 C20 C21 C22 -179.1(3) . . . . ? 
C26 C21 C22 C23 108.9(7) . . . . ? 
C20 C21 C22 C23 -69.8(7) . . . . ? 
C26 C21 C22 C24 -126.1(4) . . . . ? 
C20 C21 C22 C24 55.2(5) . . . . ? 
C26 C21 C22 C25 -10.8(6) . . . . ? 
C20 C21 C22 C25 170.4(5) . . . . ? 
C20 C21 C26 C27 -2.0(5) . . . . ? 
C22 C21 C26 C27 179.2(3) . . . . ? 
C21 C26 C27 C18 -0.2(5) . . . . ? 
C19 C18 C27 C26 2.5(4) . . . . ? 
N1 C18 C27 C26 -179.0(3) . . . . ? 
C14 C13 C28 O2 -11.4(7) . . . . ? 
C12 C13 C28 O2 168.6(5) . . . . ? 
C14 C13 C28 O1 172.1(4) . . . . ? 
C12 C13 C28 O1 -7.9(6) . . . . ? 
C16 C17 N1 C18 178.8(2) . . . . ? 
C16 C17 N1 Rh1 2.9(3) . . . . ? 
C19 C18 N1 C17 -128.9(3) . . . . ? 
C27 C18 N1 C17 52.7(4) . . . . ? 
C19 C18 N1 Rh1 46.6(3) . . . . ? 
C27 C18 N1 Rh1 -131.8(2) . . . . ? 
O2 C28 O1 C29 4.4(8) . . . . ? 
C13 C28 O1 C29 -179.1(5) . . . . ? 
C12 C11 Rh1 N1 175.2(3) . . . . ? 
C16 C11 Rh1 N1 1.27(18) . . . . ? 
C12 C11 Rh1 C3 -7.1(3) . . . . ? 
C16 C11 Rh1 C3 179.00(18) . . . . ? 
C12 C11 Rh1 C7 -78.8(3) . . . . ? 
C16 C11 Rh1 C7 107.21(19) . . . . ? 
C12 C11 Rh1 C5 -41.0(3) . . . . ? 
C16 C11 Rh1 C5 145.01(19) . . . . ? 
C12 C11 Rh1 C2 -8.0(4) . . . . ? 
C16 C11 Rh1 C2 178.1(2) . . . . ? 
C12 C11 Rh1 C1 -93.1(3) . . . . ? 
C16 C11 Rh1 C1 93.0(3) . . . . ? 
C12 C11 Rh1 Cl1 86.2(2) . . . . ? 
C16 C11 Rh1 Cl1 -87.74(19) . . . . ? 
C17 N1 Rh1 C11 -2.31(19) . . . . ? 
C18 N1 Rh1 C11 -177.9(2) . . . . ? 
C17 N1 Rh1 C3 -176.5(3) . . . . ? 
C18 N1 Rh1 C3 7.9(4) . . . . ? 
C17 N1 Rh1 C7 -111.89(19) . . . . ? 
C18 N1 Rh1 C7 72.5(2) . . . . ? 
C17 N1 Rh1 C5 -92.5(2) . . . . ? 
C18 N1 Rh1 C5 91.9(2) . . . . ? 
C17 N1 Rh1 C2 179.04(18) . . . . ? 
C18 N1 Rh1 C2 3.4(2) . . . . ? 
C17 N1 Rh1 C1 -150.16(19) . . . . ? 
C18 N1 Rh1 C1 34.2(2) . . . . ? 
C17 N1 Rh1 Cl1 84.42(18) . . . . ? 
C18 N1 Rh1 Cl1 -91.21(19) . . . . ? 
C5 C3 Rh1 C11 -63.10(18) . . . . ? 
C2 C3 Rh1 C11 -179.46(15) . . . . ? 
C4 C3 Rh1 C11 59.5(3) . . . . ? 
C5 C3 Rh1 N1 110.2(3) . . . . ? 
C2 C3 Rh1 N1 -6.1(4) . . . . ? 
C4 C3 Rh1 N1 -127.2(3) . . . . ? 
C5 C3 Rh1 C7 38.02(15) . . . . ? 
C2 C3 Rh1 C7 -78.34(17) . . . . ? 
C4 C3 Rh1 C7 160.6(4) . . . . ? 
C2 C3 Rh1 C5 -116.4(2) . . . . ? 
C4 C3 Rh1 C5 122.6(4) . . . . ? 
C5 C3 Rh1 C2 116.4(2) . . . . ? 
C4 C3 Rh1 C2 -121.0(4) . . . . ? 
C5 C3 Rh1 C1 80.66(16) . . . . ? 
C2 C3 Rh1 C1 -35.70(15) . . . . ? 
C4 C3 Rh1 C1 -156.7(4) . . . . ? 
C5 C3 Rh1 Cl1 -151.73(14) . . . . ? 
C2 C3 Rh1 Cl1 91.90(15) . . . . ? 
C4 C3 Rh1 Cl1 -29.1(3) . . . . ? 
C5 C7 Rh1 C11 76.96(18) . . . . ? 
C1 C7 Rh1 C11 -167.88(15) . . . . ? 
C8 C7 Rh1 C11 -45.1(3) . . . . ? 
C5 C7 Rh1 N1 161.80(15) . . . . ? 
C1 C7 Rh1 N1 -83.04(16) . . . . ? 
C8 C7 Rh1 N1 39.7(3) . . . . ? 
C5 C7 Rh1 C3 -37.86(16) . . . . ? 
C1 C7 Rh1 C3 77.29(17) . . . . ? 
C8 C7 Rh1 C3 -160.0(3) . . . . ? 
C1 C7 Rh1 C5 115.2(2) . . . . ? 
C8 C7 Rh1 C5 -122.1(4) . . . . ? 
C5 C7 Rh1 C2 -80.83(17) . . . . ? 
C1 C7 Rh1 C2 34.32(16) . . . . ? 
C8 C7 Rh1 C2 157.1(3) . . . . ? 
C5 C7 Rh1 C1 -115.2(2) . . . . ? 
C8 C7 Rh1 C1 122.8(4) . . . . ? 
C5 C7 Rh1 Cl1 -62.9(2) . . . . ? 
C1 C7 Rh1 Cl1 52.3(3) . . . . ? 
C8 C7 Rh1 Cl1 175.0(2) . . . . ? 
C3 C5 Rh1 C11 129.19(16) . . . . ? 
C7 C5 Rh1 C11 -113.74(16) . . . . ? 
C6 C5 Rh1 C11 6.9(3) . . . . ? 
C3 C5 Rh1 N1 -147.48(18) . . . . ? 
C7 C5 Rh1 N1 -30.4(2) . . . . ? 
C6 C5 Rh1 N1 90.3(3) . . . . ? 
C7 C5 Rh1 C3 117.1(2) . . . . ? 
C6 C5 Rh1 C3 -122.3(4) . . . . ? 
C3 C5 Rh1 C7 -117.1(2) . . . . ? 
C6 C5 Rh1 C7 120.7(4) . . . . ? 
C3 C5 Rh1 C2 -38.29(16) . . . . ? 
C7 C5 Rh1 C2 78.78(16) . . . . ? 
C6 C5 Rh1 C2 -160.6(3) . . . . ? 
C3 C5 Rh1 C1 -78.44(17) . . . . ? 
C7 C5 Rh1 C1 38.62(15) . . . . ? 
C6 C5 Rh1 C1 159.3(3) . . . . ? 
C3 C5 Rh1 Cl1 36.40(18) . . . . ? 
C7 C5 Rh1 Cl1 153.47(13) . . . . ? 
C6 C5 Rh1 Cl1 -85.9(3) . . . . ? 
C1 C2 Rh1 C11 -116.6(3) . . . . ? 
C3 C2 Rh1 C11 1.3(4) . . . . ? 
C9 C2 Rh1 C11 119.7(3) . . . . ? 
C1 C2 Rh1 N1 59.67(18) . . . . ? 
C3 C2 Rh1 N1 177.58(14) . . . . ? 
C9 C2 Rh1 N1 -64.1(3) . . . . ? 
C1 C2 Rh1 C3 -117.9(2) . . . . ? 
C9 C2 Rh1 C3 118.4(4) . . . . ? 
C1 C2 Rh1 C7 -36.37(15) . . . . ? 
C3 C2 Rh1 C7 81.54(17) . . . . ? 
C9 C2 Rh1 C7 -160.1(3) . . . . ? 
C1 C2 Rh1 C5 -79.62(17) . . . . ? 
C3 C2 Rh1 C5 38.29(16) . . . . ? 
C9 C2 Rh1 C5 156.7(3) . . . . ? 
C3 C2 Rh1 C1 117.9(2) . . . . ? 
C9 C2 Rh1 C1 -123.7(4) . . . . ? 
C1 C2 Rh1 Cl1 150.72(15) . . . . ? 
C3 C2 Rh1 Cl1 -91.37(16) . . . . ? 
C9 C2 Rh1 Cl1 27.0(3) . . . . ? 
C2 C1 Rh1 C11 142.6(2) . . . . ? 
C7 C1 Rh1 C11 21.8(3) . . . . ? 
C10 C1 Rh1 C11 -93.9(3) . . . . ? 
C2 C1 Rh1 N1 -132.10(16) . . . . ? 
C7 C1 Rh1 N1 107.14(15) . . . . ? 
C10 C1 Rh1 N1 -8.6(3) . . . . ? 
C2 C1 Rh1 C3 38.24(17) . . . . ? 
C7 C1 Rh1 C3 -82.52(17) . . . . ? 
C10 C1 Rh1 C3 161.7(3) . . . . ? 
C2 C1 Rh1 C7 120.8(2) . . . . ? 
C10 C1 Rh1 C7 -115.7(3) . . . . ? 
C2 C1 Rh1 C5 81.58(18) . . . . ? 
C7 C1 Rh1 C5 -39.18(16) . . . . ? 
C10 C1 Rh1 C5 -154.9(3) . . . . ? 
C7 C1 Rh1 C2 -120.8(2) . . . . ? 
C10 C1 Rh1 C2 123.5(3) . . . . ? 
C2 C1 Rh1 Cl1 -36.55(18) . . . . ? 
C7 C1 Rh1 Cl1 -157.30(13) . . . . ? 
C10 C1 Rh1 Cl1 87.0(3) . . . . ? 
 
_diffrn_measured_fraction_theta_max    0.982 
_diffrn_reflns_theta_full              27.72 
_diffrn_measured_fraction_theta_full   0.982 
_refine_diff_density_max    0.567 
_refine_diff_density_min   -0.319 
_refine_diff_density_rms    0.063 

#####################################################END

data_2 
 
_audit_creation_method            SHELXL-97 
_chemical_name_systematic 
; 
 ? 
; 
_chemical_name_common             ? 
_chemical_melting_point           ? 
_chemical_formula_moiety          
'C27 H32 Cl N2 O2 Rh' 
_chemical_formula_sum 
 'C27 H32 Cl N2 O2 Rh' 
_chemical_formula_weight          554.91 
 
loop_ 
 _atom_type_symbol 
 _atom_type_description 
 _atom_type_scat_dispersion_real 
 _atom_type_scat_dispersion_imag 
 _atom_type_scat_source 
 'C'  'C'   0.0033   0.0016 
 'International Tables Vol C Tables 4.2.6.8 and 6.1.1.4' 
 'H'  'H'   0.0000   0.0000 
 'International Tables Vol C Tables 4.2.6.8 and 6.1.1.4' 
 'N'  'N'   0.0061   0.0033 
 'International Tables Vol C Tables 4.2.6.8 and 6.1.1.4' 
 'O'  'O'   0.0106   0.0060 
 'International Tables Vol C Tables 4.2.6.8 and 6.1.1.4' 
 'Cl'  'Cl'   0.1484   0.1585 
 'International Tables Vol C Tables 4.2.6.8 and 6.1.1.4' 
 'Rh'  'Rh'  -1.1178   0.9187 
 'International Tables Vol C Tables 4.2.6.8 and 6.1.1.4' 
 
_symmetry_cell_setting            'Triclinic' 
_symmetry_space_group_name_H-M    'P -1' 
_symmetry_space_group_name_Hall   '-P 1'
  
loop_ 
 _symmetry_equiv_pos_as_xyz 
 'x, y, z' 
 '-x, -y, -z' 
 
_cell_length_a                    8.337(2) 
_cell_length_b                    12.012(4) 
_cell_length_c                    13.615(4) 
_cell_angle_alpha                 100.444(12) 
_cell_angle_beta                  98.346(12) 
_cell_angle_gamma                 98.460(12) 
_cell_volume                      1305.4(7) 
_cell_formula_units_Z             2 
_cell_measurement_temperature     296(2) 
_cell_measurement_reflns_used     9862 
_cell_measurement_theta_min       2.57 
_cell_measurement_theta_max       27.60 
 
_exptl_crystal_description        'Rectangular' 
_exptl_crystal_colour             'colorless' 
_exptl_crystal_size_max           0.14 
_exptl_crystal_size_mid           0.09 
_exptl_crystal_size_min           0.05 
_exptl_crystal_density_meas       ? 
_exptl_crystal_density_diffrn     1.412 
_exptl_crystal_density_method     'not measured' 
_exptl_crystal_F_000              572 
_exptl_absorpt_coefficient_mu     0.782 
_exptl_absorpt_correction_type    'Multi-scan' 
_exptl_absorpt_correction_T_min   0.6760  
_exptl_absorpt_correction_T_max   0.7456 
_exptl_absorpt_process_details    
'SADABS-2008/1 - Bruker AXS area detector scaling and absorption correction'  
 
_exptl_special_details 
; 
 ? 
; 
 
_diffrn_ambient_temperature       296(2) 
_diffrn_radiation_wavelength      0.71073 
_diffrn_radiation_type            MoK\a 
_diffrn_radiation_source          'fine-focus sealed tube' 
_diffrn_radiation_monochromator   graphite 
_diffrn_measurement_device_type   'Bruker APEX-II CCD' 
_diffrn_measurement_method        '\f and \w scans'
_diffrn_detector_area_resol_mean  ? 
_diffrn_standards_number          ? 
_diffrn_standards_interval_count  ? 
_diffrn_standards_interval_time   ? 
_diffrn_standards_decay_%         ? 
_diffrn_reflns_number             21828 
_diffrn_reflns_av_R_equivalents   0.0334 
_diffrn_reflns_av_sigmaI/netI     0.0274 
_diffrn_reflns_limit_h_min        -10 
_diffrn_reflns_limit_h_max        10 
_diffrn_reflns_limit_k_min        -15 
_diffrn_reflns_limit_k_max        15 
_diffrn_reflns_limit_l_min        -17 
_diffrn_reflns_limit_l_max        17 
_diffrn_reflns_theta_min          1.55 
_diffrn_reflns_theta_max          27.76 
_reflns_number_total              6145 
_reflns_number_gt                 5507 
_reflns_threshold_expression      >2sigma(I) 
 
_computing_data_collection        'Bruker APEX2' 
_computing_cell_refinement        'Bruker SAINT' 
_computing_data_reduction         'Bruker SAINT' 
_computing_structure_solution     'Sir-92 (Altomare et al., 1993)' 
_computing_structure_refinement   'SHELXL-97 (Sheldrick, 2008)' 
_computing_molecular_graphics     'Bruker SHELXTL' 
_computing_publication_material   'Bruker SHELXTL' 
 
_refine_special_details 
; 
 Refinement of F^2^ against ALL reflections.  The weighted R-factor wR and 
 goodness of fit S are based on F^2^, conventional R-factors R are based 
 on F, with F set to zero for negative F^2^. The threshold expression of 
 F^2^ > 2sigma(F^2^) is used only for calculating R-factors(gt) etc. and is 
 not relevant to the choice of reflections for refinement.  R-factors based 
 on F^2^ are statistically about twice as large as those based on F, and R- 
 factors based on ALL data will be even larger. 
; 
 
_refine_ls_structure_factor_coef  Fsqd  
_refine_ls_matrix_type            full 
_refine_ls_weighting_scheme       calc  
_refine_ls_weighting_details 
 'calc w=1/[\s^2^(Fo^2^)+(0.0661P)^2^+0.9045P] where P=(Fo^2^+2Fc^2^)/3' 
_atom_sites_solution_primary      direct 
_atom_sites_solution_secondary    difmap 
_atom_sites_solution_hydrogens    geom 
_refine_ls_hydrogen_treatment     none 
_refine_ls_extinction_method      none 
_refine_ls_extinction_coef        ? 
_refine_ls_number_reflns          6145 
_refine_ls_number_parameters      305 
_refine_ls_number_restraints      0 
_refine_ls_R_factor_all           0.0329 
_refine_ls_R_factor_gt            0.0289 
_refine_ls_wR_factor_ref          0.0876 
_refine_ls_wR_factor_gt           0.0825 
_refine_ls_goodness_of_fit_ref    0.836 
_refine_ls_restrained_S_all       0.836 
_refine_ls_shift/su_max           0.002 
_refine_ls_shift/su_mean          0.000 
 
loop_ 
 _atom_site_label 
 _atom_site_type_symbol 
 _atom_site_fract_x 
 _atom_site_fract_y 
 _atom_site_fract_z 
 _atom_site_U_iso_or_equiv 
 _atom_site_adp_type 
 _atom_site_occupancy 
 _atom_site_symmetry_multiplicity 
 _atom_site_calc_flag 
 _atom_site_refinement_flags 
 _atom_site_disorder_assembly 
 _atom_site_disorder_group 
C1 C 0.5750(4) 1.1152(3) 0.8070(2) 0.0741(9) Uani 1 1 d . . . 
C2 C 0.6147(4) 1.0054(3) 0.7930(2) 0.0661(7) Uani 1 1 d . . . 
H2 H 0.6050 0.9614 0.8422 0.079 Uiso 1 1 calc R . . 
C3 C 0.6692(3) 0.9626(2) 0.70379(17) 0.0456(5) Uani 1 1 d . . . 
C4 C 0.6722(3) 1.0321(2) 0.63149(19) 0.0488(5) Uani 1 1 d . . . 
C5 C 0.6288(4) 1.1415(3) 0.6474(2) 0.0654(8) Uani 1 1 d . . . 
H5 H 0.6309 1.1848 0.5973 0.078 Uiso 1 1 calc R . . 
C6 C 0.5830(4) 1.1843(3) 0.7383(3) 0.0776(10) Uani 1 1 d . . . 
H6 H 0.5583 1.2579 0.7521 0.093 Uiso 1 1 calc R . . 
C7 C 0.7128(3) 0.9783(2) 0.53648(18) 0.0468(5) Uani 1 1 d . . . 
H7 H 0.7140 1.0153 0.4822 0.056 Uiso 1 1 calc R . . 
C8 C 0.7809(3) 0.8143(2) 0.43814(15) 0.0409(4) Uani 1 1 d . . . 
C9 C 0.7138(3) 0.6989(2) 0.40567(17) 0.0460(5) Uani 1 1 d . . . 
H9 H 0.6481 0.6622 0.4442 0.055 Uiso 1 1 calc R . . 
C10 C 0.7443(3) 0.6375(2) 0.31551(18) 0.0501(5) Uani 1 1 d . . . 
H10 H 0.6975 0.5600 0.2944 0.060 Uiso 1 1 calc R . . 
C11 C 0.8422(3) 0.6884(2) 0.25645(18) 0.0498(5) Uani 1 1 d . . . 
C12 C 0.9107(4) 0.8040(3) 0.29098(19) 0.0589(7) Uani 1 1 d . . . 
H12 H 0.9785 0.8403 0.2533 0.071 Uiso 1 1 calc R . . 
C13 C 0.8802(3) 0.8668(2) 0.38075(19) 0.0554(6) Uani 1 1 d . . . 
H13 H 0.9268 0.9444 0.4021 0.067 Uiso 1 1 calc R . . 
C14 C 0.8814(4) 0.6174(3) 0.1592(2) 0.0607(7) Uani 1 1 d . . . 
C15 C 0.9430(7) 0.6970(4) 0.0902(3) 0.1092(16) Uani 1 1 d . . . 
H15A H 0.8593 0.7400 0.0712 0.164 Uiso 1 1 calc R . . 
H15B H 0.9669 0.6515 0.0303 0.164 Uiso 1 1 calc R . . 
H15C H 1.0410 0.7491 0.1261 0.164 Uiso 1 1 calc R . . 
C16 C 1.0136(8) 0.5538(6) 0.1889(4) 0.157(3) Uani 1 1 d . . . 
H16A H 1.0890 0.6001 0.2469 0.235 Uiso 1 1 calc R . . 
H16B H 1.0714 0.5367 0.1336 0.235 Uiso 1 1 calc R . . 
H16C H 0.9660 0.4833 0.2056 0.235 Uiso 1 1 calc R . . 
C17 C 0.7281(6) 0.5407(4) 0.0964(3) 0.1082(16) Uani 1 1 d . . . 
H17A H 0.6987 0.4767 0.1275 0.162 Uiso 1 1 calc R . . 
H17B H 0.7480 0.5129 0.0294 0.162 Uiso 1 1 calc R . . 
H17C H 0.6396 0.5835 0.0924 0.162 Uiso 1 1 calc R . . 
C18 C 0.7442(4) 0.7046(2) 0.77431(19) 0.0559(6) Uani 1 1 d . . . 
C19 C 0.8744(3) 0.8007(2) 0.80455(17) 0.0493(5) Uani 1 1 d . . . 
C20 C 0.9769(3) 0.7961(2) 0.72897(18) 0.0466(5) Uani 1 1 d . . . 
C21 C 0.9183(3) 0.6886(2) 0.65663(19) 0.0506(6) Uani 1 1 d . . . 
C22 C 0.7775(4) 0.6334(2) 0.6827(2) 0.0548(6) Uani 1 1 d . . . 
C23 C 0.6076(5) 0.6718(4) 0.8290(3) 0.0936(13) Uani 1 1 d . . . 
H23A H 0.6083 0.7332 0.8852 0.140 Uiso 1 1 calc R . . 
H23B H 0.6226 0.6034 0.8536 0.140 Uiso 1 1 calc R . . 
H23C H 0.5041 0.6578 0.7835 0.140 Uiso 1 1 calc R . . 
C24 C 0.9090(5) 0.8889(3) 0.9021(2) 0.0733(9) Uani 1 1 d . . . 
H24A H 0.9976 0.8726 0.9476 0.110 Uiso 1 1 calc R . . 
H24B H 0.8121 0.8864 0.9327 0.110 Uiso 1 1 calc R . . 
H24C H 0.9393 0.9641 0.8884 0.110 Uiso 1 1 calc R . . 
C25 C 1.1367(4) 0.8753(3) 0.7364(3) 0.0716(8) Uani 1 1 d . . . 
H25A H 1.1271 0.9523 0.7662 0.107 Uiso 1 1 calc R . . 
H25B H 1.1627 0.8734 0.6697 0.107 Uiso 1 1 calc R . . 
H25C H 1.2226 0.8510 0.7778 0.107 Uiso 1 1 calc R . . 
C26 C 1.0058(4) 0.6465(3) 0.5719(3) 0.0794(10) Uani 1 1 d . . . 
H26A H 1.0407 0.7090 0.5403 0.119 Uiso 1 1 calc R . . 
H26B H 0.9324 0.5864 0.5226 0.119 Uiso 1 1 calc R . . 
H26C H 1.1003 0.6172 0.5987 0.119 Uiso 1 1 calc R . . 
C27 C 0.6725(5) 0.5205(2) 0.6282(3) 0.0852(11) Uani 1 1 d . . . 
H27A H 0.5622 0.5318 0.6070 0.128 Uiso 1 1 calc R . . 
H27B H 0.6713 0.4672 0.6729 0.128 Uiso 1 1 calc R . . 
H27C H 0.7169 0.4903 0.5698 0.128 Uiso 1 1 calc R . . 
N1 N 0.5181(7) 1.1583(4) 0.9028(3) 0.1254(17) Uani 1 1 d . . . 
N2 N 0.7475(2) 0.87581(16) 0.53091(13) 0.0388(4) Uani 1 1 d . . . 
O1 O 0.5252(8) 1.2601(4) 0.9267(3) 0.185(2) Uani 1 1 d . . . 
O2 O 0.4858(13) 1.1010(5) 0.9543(5) 0.317(6) Uani 1 1 d . . . 
Cl1 Cl 0.44356(7) 0.73959(7) 0.59195(5) 0.05924(17) Uani 1 1 d . . . 
Rh1 Rh 0.729816(18) 0.806684(13) 0.660277(11) 0.03581(7) Uani 1 1 d . . . 
 
loop_ 
 _atom_site_aniso_label 
 _atom_site_aniso_U_11 
 _atom_site_aniso_U_22 
 _atom_site_aniso_U_33 
 _atom_site_aniso_U_23 
 _atom_site_aniso_U_13 
 _atom_site_aniso_U_12 
C1 0.081(2) 0.077(2) 0.0624(18) -0.0131(16) 0.0147(15) 0.0392(17) 
C2 0.081(2) 0.0666(18) 0.0543(15) -0.0003(13) 0.0250(14) 0.0278(15) 
C3 0.0469(12) 0.0468(12) 0.0403(11) -0.0015(9) 0.0075(9) 0.0130(10) 
C4 0.0478(12) 0.0451(12) 0.0477(12) -0.0009(10) -0.0018(10) 0.0132(10) 
C5 0.0739(18) 0.0553(15) 0.0620(16) 0.0027(13) -0.0076(14) 0.0265(14) 
C6 0.086(2) 0.0641(18) 0.074(2) -0.0146(15) -0.0067(16) 0.0425(17) 
C7 0.0529(13) 0.0433(12) 0.0420(11) 0.0078(9) 0.0041(10) 0.0070(10) 
C8 0.0425(11) 0.0477(12) 0.0310(10) 0.0053(8) 0.0077(8) 0.0060(9) 
C9 0.0516(12) 0.0472(12) 0.0381(11) 0.0049(9) 0.0167(9) 0.0014(10) 
C10 0.0580(14) 0.0476(13) 0.0421(12) 0.0013(10) 0.0152(10) 0.0051(10) 
C11 0.0523(13) 0.0634(15) 0.0360(11) 0.0069(10) 0.0143(10) 0.0154(11) 
C12 0.0662(16) 0.0681(17) 0.0418(12) 0.0105(11) 0.0235(12) -0.0025(13) 
C13 0.0669(16) 0.0508(14) 0.0445(12) 0.0059(10) 0.0176(11) -0.0057(12) 
C14 0.0673(16) 0.0771(18) 0.0413(13) 0.0035(12) 0.0198(12) 0.0247(14) 
C15 0.150(4) 0.121(4) 0.058(2) 0.007(2) 0.055(2) 0.011(3) 
C16 0.209(6) 0.217(7) 0.078(3) 0.009(3) 0.028(3) 0.169(6) 
C17 0.124(4) 0.113(3) 0.066(2) -0.032(2) 0.038(2) -0.007(3) 
C18 0.0659(16) 0.0561(15) 0.0413(12) 0.0160(11) 0.0022(11) -0.0028(12) 
C19 0.0614(14) 0.0446(12) 0.0359(11) 0.0037(9) -0.0013(10) 0.0051(10) 
C20 0.0460(12) 0.0408(11) 0.0484(12) 0.0047(9) -0.0013(10) 0.0078(9) 
C21 0.0547(13) 0.0448(12) 0.0486(13) -0.0005(10) -0.0013(10) 0.0195(11) 
C22 0.0678(16) 0.0358(11) 0.0511(13) 0.0057(10) -0.0106(12) 0.0030(11) 
C23 0.103(3) 0.111(3) 0.066(2) 0.039(2) 0.0203(19) -0.017(2) 
C24 0.094(2) 0.0722(19) 0.0390(13) -0.0078(12) -0.0055(14) 0.0089(17) 
C25 0.0474(15) 0.0654(18) 0.095(2) 0.0127(16) 0.0048(15) 0.0022(13) 
C26 0.0659(18) 0.092(2) 0.074(2) -0.0158(17) 0.0059(15) 0.0425(18) 
C27 0.101(3) 0.0394(14) 0.092(2) 0.0055(15) -0.029(2) -0.0076(15) 
N1 0.185(4) 0.126(3) 0.078(2) -0.015(2) 0.044(3) 0.094(3) 
N2 0.0399(9) 0.0401(9) 0.0336(8) 0.0032(7) 0.0068(7) 0.0028(7) 
O1 0.298(6) 0.158(4) 0.118(3) -0.024(3) 0.060(3) 0.139(4) 
O2 0.677(17) 0.169(5) 0.214(6) 0.048(4) 0.324(9) 0.166(7) 
Cl1 0.0371(3) 0.0778(4) 0.0574(4) 0.0028(3) 0.0125(2) 0.0029(3) 
Rh1 0.03857(10) 0.03734(10) 0.02976(10) 0.00098(6) 0.00868(6) 0.00591(7) 
 
_geom_special_details 
; 
 All esds (except the esd in the dihedral angle between two l.s. planes) 
 are estimated using the full covariance matrix.  The cell esds are taken 
 into account individually in the estimation of esds in distances, angles 
 and torsion angles; correlations between esds in cell parameters are only 
 used when they are defined by crystal symmetry.  An approximate (isotropic) 
 treatment of cell esds is used for estimating esds involving l.s. planes. 
; 
 
loop_ 
 _geom_bond_atom_site_label_1 
 _geom_bond_atom_site_label_2 
 _geom_bond_distance 
 _geom_bond_site_symmetry_2 
 _geom_bond_publ_flag 
C1 C6 1.361(5) . ? 
C1 C2 1.393(4) . ? 
C1 N1 1.483(5) . ? 
C2 C3 1.396(3) . ? 
C2 H2 0.9300 . ? 
C3 C4 1.402(4) . ? 
C3 Rh1 2.019(2) . ? 
C4 C5 1.401(4) . ? 
C4 C7 1.447(3) . ? 
C5 C6 1.380(5) . ? 
C5 H5 0.9300 . ? 
C6 H6 0.9300 . ? 
C7 N2 1.297(3) . ? 
C7 H7 0.9300 . ? 
C8 C13 1.381(3) . ? 
C8 C9 1.381(3) . ? 
C8 N2 1.430(3) . ? 
C9 C10 1.390(3) . ? 
C9 H9 0.9300 . ? 
C10 C11 1.381(4) . ? 
C10 H10 0.9300 . ? 
C11 C12 1.388(4) . ? 
C11 C14 1.545(3) . ? 
C12 C13 1.393(4) . ? 
C12 H12 0.9300 . ? 
C13 H13 0.9300 . ? 
C14 C16 1.481(5) . ? 
C14 C17 1.504(5) . ? 
C14 C15 1.544(5) . ? 
C15 H15A 0.9600 . ? 
C15 H15B 0.9600 . ? 
C15 H15C 0.9600 . ? 
C16 H16A 0.9600 . ? 
C16 H16B 0.9600 . ? 
C16 H16C 0.9600 . ? 
C17 H17A 0.9600 . ? 
C17 H17B 0.9600 . ? 
C17 H17C 0.9600 . ? 
C18 C19 1.418(4) . ? 
C18 C22 1.465(4) . ? 
C18 C23 1.492(4) . ? 
C18 Rh1 2.147(3) . ? 
C19 C20 1.428(4) . ? 
C19 C24 1.503(3) . ? 
C19 Rh1 2.169(2) . ? 
C20 C21 1.446(3) . ? 
C20 C25 1.498(4) . ? 
C20 Rh1 2.166(2) . ? 
C21 C22 1.386(4) . ? 
C21 C26 1.504(4) . ? 
C21 Rh1 2.266(2) . ? 
C22 C27 1.501(4) . ? 
C22 Rh1 2.240(3) . ? 
C23 H23A 0.9600 . ? 
C23 H23B 0.9600 . ? 
C23 H23C 0.9600 . ? 
C24 H24A 0.9600 . ? 
C24 H24B 0.9600 . ? 
C24 H24C 0.9600 . ? 
C25 H25A 0.9600 . ? 
C25 H25B 0.9600 . ? 
C25 H25C 0.9600 . ? 
C26 H26A 0.9600 . ? 
C26 H26B 0.9600 . ? 
C26 H26C 0.9600 . ? 
C27 H27A 0.9600 . ? 
C27 H27B 0.9600 . ? 
C27 H27C 0.9600 . ? 
N1 O2 1.101(7) . ? 
N1 O1 1.197(6) . ? 
N2 Rh1 2.0935(19) . ? 
Cl1 Rh1 2.3933(9) . ? 
 
loop_ 
 _geom_angle_atom_site_label_1 
 _geom_angle_atom_site_label_2 
 _geom_angle_atom_site_label_3 
 _geom_angle 
 _geom_angle_site_symmetry_1 
 _geom_angle_site_symmetry_3 
 _geom_angle_publ_flag 
C6 C1 C2 124.4(3) . . ? 
C6 C1 N1 118.2(3) . . ? 
C2 C1 N1 117.4(4) . . ? 
C1 C2 C3 118.8(3) . . ? 
C1 C2 H2 120.6 . . ? 
C3 C2 H2 120.6 . . ? 
C2 C3 C4 116.9(2) . . ? 
C2 C3 Rh1 128.0(2) . . ? 
C4 C3 Rh1 114.93(17) . . ? 
C5 C4 C3 122.8(2) . . ? 
C5 C4 C7 122.7(3) . . ? 
C3 C4 C7 114.3(2) . . ? 
C6 C5 C4 119.2(3) . . ? 
C6 C5 H5 120.4 . . ? 
C4 C5 H5 120.4 . . ? 
C1 C6 C5 117.9(3) . . ? 
C1 C6 H6 121.1 . . ? 
C5 C6 H6 121.1 . . ? 
N2 C7 C4 116.6(2) . . ? 
N2 C7 H7 121.7 . . ? 
C4 C7 H7 121.7 . . ? 
C13 C8 C9 119.1(2) . . ? 
C13 C8 N2 121.7(2) . . ? 
C9 C8 N2 119.13(19) . . ? 
C8 C9 C10 120.1(2) . . ? 
C8 C9 H9 120.0 . . ? 
C10 C9 H9 120.0 . . ? 
C11 C10 C9 121.9(2) . . ? 
C11 C10 H10 119.1 . . ? 
C9 C10 H10 119.1 . . ? 
C10 C11 C12 117.3(2) . . ? 
C10 C11 C14 121.0(3) . . ? 
C12 C11 C14 121.6(2) . . ? 
C11 C12 C13 121.5(2) . . ? 
C11 C12 H12 119.3 . . ? 
C13 C12 H12 119.3 . . ? 
C8 C13 C12 120.1(2) . . ? 
C8 C13 H13 119.9 . . ? 
C12 C13 H13 119.9 . . ? 
C16 C14 C17 113.4(4) . . ? 
C16 C14 C15 108.4(4) . . ? 
C17 C14 C15 105.1(3) . . ? 
C16 C14 C11 108.4(3) . . ? 
C17 C14 C11 110.8(3) . . ? 
C15 C14 C11 110.7(3) . . ? 
C14 C15 H15A 109.5 . . ? 
C14 C15 H15B 109.5 . . ? 
H15A C15 H15B 109.5 . . ? 
C14 C15 H15C 109.5 . . ? 
H15A C15 H15C 109.5 . . ? 
H15B C15 H15C 109.5 . . ? 
C14 C16 H16A 109.5 . . ? 
C14 C16 H16B 109.5 . . ? 
H16A C16 H16B 109.5 . . ? 
C14 C16 H16C 109.5 . . ? 
H16A C16 H16C 109.5 . . ? 
H16B C16 H16C 109.5 . . ? 
C14 C17 H17A 109.5 . . ? 
C14 C17 H17B 109.5 . . ? 
H17A C17 H17B 109.5 . . ? 
C14 C17 H17C 109.5 . . ? 
H17A C17 H17C 109.5 . . ? 
H17B C17 H17C 109.5 . . ? 
C19 C18 C22 106.9(2) . . ? 
C19 C18 C23 128.0(3) . . ? 
C22 C18 C23 124.7(3) . . ? 
C19 C18 Rh1 71.68(14) . . ? 
C22 C18 Rh1 73.98(14) . . ? 
C23 C18 Rh1 124.7(2) . . ? 
C18 C19 C20 108.3(2) . . ? 
C18 C19 C24 127.0(3) . . ? 
C20 C19 C24 124.6(3) . . ? 
C18 C19 Rh1 69.97(14) . . ? 
C20 C19 Rh1 70.66(13) . . ? 
C24 C19 Rh1 128.3(2) . . ? 
C19 C20 C21 107.6(2) . . ? 
C19 C20 C25 125.4(2) . . ? 
C21 C20 C25 125.8(3) . . ? 
C19 C20 Rh1 70.88(14) . . ? 
C21 C20 Rh1 74.75(13) . . ? 
C25 C20 Rh1 129.96(19) . . ? 
C22 C21 C20 108.4(2) . . ? 
C22 C21 C26 128.2(3) . . ? 
C20 C21 C26 123.4(3) . . ? 
C22 C21 Rh1 71.08(15) . . ? 
C20 C21 Rh1 67.26(13) . . ? 
C26 C21 Rh1 129.3(2) . . ? 
C21 C22 C18 108.5(2) . . ? 
C21 C22 C27 127.3(3) . . ? 
C18 C22 C27 124.2(3) . . ? 
C21 C22 Rh1 73.11(14) . . ? 
C18 C22 Rh1 67.07(14) . . ? 
C27 C22 Rh1 125.2(2) . . ? 
C18 C23 H23A 109.5 . . ? 
C18 C23 H23B 109.5 . . ? 
H23A C23 H23B 109.5 . . ? 
C18 C23 H23C 109.5 . . ? 
H23A C23 H23C 109.5 . . ? 
H23B C23 H23C 109.5 . . ? 
C19 C24 H24A 109.5 . . ? 
C19 C24 H24B 109.5 . . ? 
H24A C24 H24B 109.5 . . ? 
C19 C24 H24C 109.5 . . ? 
H24A C24 H24C 109.5 . . ? 
H24B C24 H24C 109.5 . . ? 
C20 C25 H25A 109.5 . . ? 
C20 C25 H25B 109.5 . . ? 
H25A C25 H25B 109.5 . . ? 
C20 C25 H25C 109.5 . . ? 
H25A C25 H25C 109.5 . . ? 
H25B C25 H25C 109.5 . . ? 
C21 C26 H26A 109.5 . . ? 
C21 C26 H26B 109.5 . . ? 
H26A C26 H26B 109.5 . . ? 
C21 C26 H26C 109.5 . . ? 
H26A C26 H26C 109.5 . . ? 
H26B C26 H26C 109.5 . . ? 
C22 C27 H27A 109.5 . . ? 
C22 C27 H27B 109.5 . . ? 
H27A C27 H27B 109.5 . . ? 
C22 C27 H27C 109.5 . . ? 
H27A C27 H27C 109.5 . . ? 
H27B C27 H27C 109.5 . . ? 
O2 N1 O1 121.2(5) . . ? 
O2 N1 C1 121.5(4) . . ? 
O1 N1 C1 116.9(5) . . ? 
C7 N2 C8 120.18(19) . . ? 
C7 N2 Rh1 115.31(15) . . ? 
C8 N2 Rh1 124.30(15) . . ? 
C3 Rh1 N2 78.75(9) . . ? 
C3 Rh1 C18 115.32(11) . . ? 
N2 Rh1 C18 165.49(10) . . ? 
C3 Rh1 C20 113.06(9) . . ? 
N2 Rh1 C20 107.62(9) . . ? 
C18 Rh1 C20 64.64(10) . . ? 
C3 Rh1 C19 97.03(10) . . ? 
N2 Rh1 C19 141.21(9) . . ? 
C18 Rh1 C19 38.35(10) . . ? 
C20 Rh1 C19 38.46(10) . . ? 
C3 Rh1 C22 154.21(11) . . ? 
N2 Rh1 C22 127.04(9) . . ? 
C18 Rh1 C22 38.94(11) . . ? 
C20 Rh1 C22 62.79(9) . . ? 
C19 Rh1 C22 63.36(9) . . ? 
C3 Rh1 C21 150.63(10) . . ? 
N2 Rh1 C21 102.94(9) . . ? 
C18 Rh1 C21 63.18(11) . . ? 
C20 Rh1 C21 37.99(9) . . ? 
C19 Rh1 C21 63.00(9) . . ? 
C22 Rh1 C21 35.81(11) . . ? 
C3 Rh1 Cl1 86.65(7) . . ? 
N2 Rh1 Cl1 87.49(6) . . ? 
C18 Rh1 Cl1 96.53(8) . . ? 
C20 Rh1 Cl1 156.81(7) . . ? 
C19 Rh1 Cl1 131.06(7) . . ? 
C22 Rh1 Cl1 94.12(7) . . ? 
C21 Rh1 Cl1 122.62(7) . . ? 
 
loop_ 
 _geom_torsion_atom_site_label_1 
 _geom_torsion_atom_site_label_2 
 _geom_torsion_atom_site_label_3 
 _geom_torsion_atom_site_label_4 
 _geom_torsion 
 _geom_torsion_site_symmetry_1 
 _geom_torsion_site_symmetry_2 
 _geom_torsion_site_symmetry_3 
 _geom_torsion_site_symmetry_4 
 _geom_torsion_publ_flag 
C6 C1 C2 C3 1.2(5) . . . . ? 
N1 C1 C2 C3 -179.8(3) . . . . ? 
C1 C2 C3 C4 -3.1(4) . . . . ? 
C1 C2 C3 Rh1 -178.3(2) . . . . ? 
C2 C3 C4 C5 2.2(4) . . . . ? 
Rh1 C3 C4 C5 178.0(2) . . . . ? 
C2 C3 C4 C7 -173.7(2) . . . . ? 
Rh1 C3 C4 C7 2.1(3) . . . . ? 
C3 C4 C5 C6 0.9(4) . . . . ? 
C7 C4 C5 C6 176.4(3) . . . . ? 
C2 C1 C6 C5 1.9(6) . . . . ? 
N1 C1 C6 C5 -177.1(4) . . . . ? 
C4 C5 C6 C1 -2.9(5) . . . . ? 
C5 C4 C7 N2 -178.6(2) . . . . ? 
C3 C4 C7 N2 -2.7(3) . . . . ? 
C13 C8 C9 C10 -1.0(4) . . . . ? 
N2 C8 C9 C10 179.8(2) . . . . ? 
C8 C9 C10 C11 0.5(4) . . . . ? 
C9 C10 C11 C12 0.4(4) . . . . ? 
C9 C10 C11 C14 177.1(3) . . . . ? 
C10 C11 C12 C13 -1.0(4) . . . . ? 
C14 C11 C12 C13 -177.6(3) . . . . ? 
C9 C8 C13 C12 0.5(4) . . . . ? 
N2 C8 C13 C12 179.7(2) . . . . ? 
C11 C12 C13 C8 0.5(5) . . . . ? 
C10 C11 C14 C16 -79.3(5) . . . . ? 
C12 C11 C14 C16 97.2(5) . . . . ? 
C10 C11 C14 C17 45.7(4) . . . . ? 
C12 C11 C14 C17 -137.8(4) . . . . ? 
C10 C11 C14 C15 161.9(3) . . . . ? 
C12 C11 C14 C15 -21.6(4) . . . . ? 
C22 C18 C19 C20 5.6(3) . . . . ? 
C23 C18 C19 C20 179.3(3) . . . . ? 
Rh1 C18 C19 C20 -60.56(17) . . . . ? 
C22 C18 C19 C24 -170.4(3) . . . . ? 
C23 C18 C19 C24 3.3(5) . . . . ? 
Rh1 C18 C19 C24 123.4(3) . . . . ? 
C22 C18 C19 Rh1 66.13(17) . . . . ? 
C23 C18 C19 Rh1 -120.2(3) . . . . ? 
C18 C19 C20 C21 -6.2(3) . . . . ? 
C24 C19 C20 C21 169.9(2) . . . . ? 
Rh1 C19 C20 C21 -66.30(16) . . . . ? 
C18 C19 C20 C25 -173.9(3) . . . . ? 
C24 C19 C20 C25 2.2(4) . . . . ? 
Rh1 C19 C20 C25 126.0(3) . . . . ? 
C18 C19 C20 Rh1 60.12(18) . . . . ? 
C24 C19 C20 Rh1 -123.8(3) . . . . ? 
C19 C20 C21 C22 4.4(3) . . . . ? 
C25 C20 C21 C22 172.0(3) . . . . ? 
Rh1 C20 C21 C22 -59.37(18) . . . . ? 
C19 C20 C21 C26 -173.2(3) . . . . ? 
C25 C20 C21 C26 -5.5(4) . . . . ? 
Rh1 C20 C21 C26 123.1(3) . . . . ? 
C19 C20 C21 Rh1 63.73(16) . . . . ? 
C25 C20 C21 Rh1 -128.6(3) . . . . ? 
C20 C21 C22 C18 -0.9(3) . . . . ? 
C26 C21 C22 C18 176.5(3) . . . . ? 
Rh1 C21 C22 C18 -57.94(18) . . . . ? 
C20 C21 C22 C27 178.7(3) . . . . ? 
C26 C21 C22 C27 -3.9(5) . . . . ? 
Rh1 C21 C22 C27 121.7(3) . . . . ? 
C20 C21 C22 Rh1 57.02(16) . . . . ? 
C26 C21 C22 Rh1 -125.6(3) . . . . ? 
C19 C18 C22 C21 -2.9(3) . . . . ? 
C23 C18 C22 C21 -176.8(3) . . . . ? 
Rh1 C18 C22 C21 61.70(18) . . . . ? 
C19 C18 C22 C27 177.5(3) . . . . ? 
C23 C18 C22 C27 3.5(5) . . . . ? 
Rh1 C18 C22 C27 -117.9(3) . . . . ? 
C19 C18 C22 Rh1 -64.58(18) . . . . ? 
C23 C18 C22 Rh1 121.5(3) . . . . ? 
C6 C1 N1 O2 167.8(8) . . . . ? 
C2 C1 N1 O2 -11.3(10) . . . . ? 
C6 C1 N1 O1 -19.8(7) . . . . ? 
C2 C1 N1 O1 161.1(5) . . . . ? 
C4 C7 N2 C8 176.9(2) . . . . ? 
C4 C7 N2 Rh1 1.9(3) . . . . ? 
C13 C8 N2 C7 43.6(3) . . . . ? 
C9 C8 N2 C7 -137.2(2) . . . . ? 
C13 C8 N2 Rh1 -141.9(2) . . . . ? 
C9 C8 N2 Rh1 37.3(3) . . . . ? 
C2 C3 Rh1 N2 174.4(3) . . . . ? 
C4 C3 Rh1 N2 -0.85(17) . . . . ? 
C2 C3 Rh1 C18 -9.4(3) . . . . ? 
C4 C3 Rh1 C18 175.40(18) . . . . ? 
C2 C3 Rh1 C20 -81.1(3) . . . . ? 
C4 C3 Rh1 C20 103.67(19) . . . . ? 
C2 C3 Rh1 C19 -44.7(3) . . . . ? 
C4 C3 Rh1 C19 140.06(19) . . . . ? 
C2 C3 Rh1 C22 -6.3(4) . . . . ? 
C4 C3 Rh1 C22 178.51(19) . . . . ? 
C2 C3 Rh1 C21 -89.2(3) . . . . ? 
C4 C3 Rh1 C21 95.6(3) . . . . ? 
C2 C3 Rh1 Cl1 86.3(3) . . . . ? 
C4 C3 Rh1 Cl1 -88.96(18) . . . . ? 
C7 N2 Rh1 C3 -0.62(17) . . . . ? 
C8 N2 Rh1 C3 -175.35(18) . . . . ? 
C7 N2 Rh1 C18 -167.0(3) . . . . ? 
C8 N2 Rh1 C18 18.3(4) . . . . ? 
C7 N2 Rh1 C20 -111.47(17) . . . . ? 
C8 N2 Rh1 C20 73.81(18) . . . . ? 
C7 N2 Rh1 C19 -87.9(2) . . . . ? 
C8 N2 Rh1 C19 97.4(2) . . . . ? 
C7 N2 Rh1 C22 179.73(17) . . . . ? 
C8 N2 Rh1 C22 5.0(2) . . . . ? 
C7 N2 Rh1 C21 -150.62(17) . . . . ? 
C8 N2 Rh1 C21 34.66(18) . . . . ? 
C7 N2 Rh1 Cl1 86.46(17) . . . . ? 
C8 N2 Rh1 Cl1 -88.27(16) . . . . ? 
C19 C18 Rh1 C3 -67.69(19) . . . . ? 
C22 C18 Rh1 C3 177.85(15) . . . . ? 
C23 C18 Rh1 C3 56.4(3) . . . . ? 
C19 C18 Rh1 N2 97.5(3) . . . . ? 
C22 C18 Rh1 N2 -17.0(4) . . . . ? 
C23 C18 Rh1 N2 -138.5(3) . . . . ? 
C19 C18 Rh1 C20 37.10(15) . . . . ? 
C22 C18 Rh1 C20 -77.36(17) . . . . ? 
C23 C18 Rh1 C20 161.1(3) . . . . ? 
C22 C18 Rh1 C19 -114.5(2) . . . . ? 
C23 C18 Rh1 C19 124.0(4) . . . . ? 
C19 C18 Rh1 C22 114.5(2) . . . . ? 
C23 C18 Rh1 C22 -121.5(3) . . . . ? 
C19 C18 Rh1 C21 79.57(17) . . . . ? 
C22 C18 Rh1 C21 -34.90(15) . . . . ? 
C23 C18 Rh1 C21 -156.4(3) . . . . ? 
C19 C18 Rh1 Cl1 -157.06(15) . . . . ? 
C22 C18 Rh1 Cl1 88.47(15) . . . . ? 
C23 C18 Rh1 Cl1 -33.0(3) . . . . ? 
C19 C20 Rh1 C3 71.22(16) . . . . ? 
C21 C20 Rh1 C3 -173.57(15) . . . . ? 
C25 C20 Rh1 C3 -49.4(3) . . . . ? 
C19 C20 Rh1 N2 156.21(13) . . . . ? 
C21 C20 Rh1 N2 -88.58(16) . . . . ? 
C25 C20 Rh1 N2 35.6(3) . . . . ? 
C19 C20 Rh1 C18 -37.00(15) . . . . ? 
C21 C20 Rh1 C18 78.21(17) . . . . ? 
C25 C20 Rh1 C18 -157.6(3) . . . . ? 
C21 C20 Rh1 C19 115.2(2) . . . . ? 
C25 C20 Rh1 C19 -120.6(3) . . . . ? 
C19 C20 Rh1 C22 -80.60(16) . . . . ? 
C21 C20 Rh1 C22 34.61(16) . . . . ? 
C25 C20 Rh1 C22 158.8(3) . . . . ? 
C19 C20 Rh1 C21 -115.2(2) . . . . ? 
C25 C20 Rh1 C21 124.2(3) . . . . ? 
C19 C20 Rh1 Cl1 -75.1(2) . . . . ? 
C21 C20 Rh1 Cl1 40.1(3) . . . . ? 
C25 C20 Rh1 Cl1 164.3(2) . . . . ? 
C18 C19 Rh1 C3 122.59(18) . . . . ? 
C20 C19 Rh1 C3 -118.63(15) . . . . ? 
C24 C19 Rh1 C3 0.7(3) . . . . ? 
C18 C19 Rh1 N2 -156.64(16) . . . . ? 
C20 C19 Rh1 N2 -37.9(2) . . . . ? 
C24 C19 Rh1 N2 81.5(3) . . . . ? 
C20 C19 Rh1 C18 118.8(2) . . . . ? 
C24 C19 Rh1 C18 -121.8(3) . . . . ? 
C18 C19 Rh1 C20 -118.8(2) . . . . ? 
C24 C19 Rh1 C20 119.4(3) . . . . ? 
C18 C19 Rh1 C22 -39.80(17) . . . . ? 
C20 C19 Rh1 C22 78.99(16) . . . . ? 
C24 C19 Rh1 C22 -161.6(3) . . . . ? 
C18 C19 Rh1 C21 -80.10(18) . . . . ? 
C20 C19 Rh1 C21 38.68(14) . . . . ? 
C24 C19 Rh1 C21 158.1(3) . . . . ? 
C18 C19 Rh1 Cl1 30.9(2) . . . . ? 
C20 C19 Rh1 Cl1 149.69(12) . . . . ? 
C24 C19 Rh1 Cl1 -90.9(3) . . . . ? 
C21 C22 Rh1 C3 -123.7(2) . . . . ? 
C18 C22 Rh1 C3 -4.5(3) . . . . ? 
C27 C22 Rh1 C3 112.2(3) . . . . ? 
C21 C22 Rh1 N2 55.50(17) . . . . ? 
C18 C22 Rh1 N2 174.74(13) . . . . ? 
C27 C22 Rh1 N2 -68.6(3) . . . . ? 
C21 C22 Rh1 C18 -119.2(2) . . . . ? 
C27 C22 Rh1 C18 116.7(4) . . . . ? 
C21 C22 Rh1 C20 -36.69(14) . . . . ? 
C18 C22 Rh1 C20 82.54(17) . . . . ? 
C27 C22 Rh1 C20 -160.8(3) . . . . ? 
C21 C22 Rh1 C19 -80.05(16) . . . . ? 
C18 C22 Rh1 C19 39.19(16) . . . . ? 
C27 C22 Rh1 C19 155.9(3) . . . . ? 
C18 C22 Rh1 C21 119.2(2) . . . . ? 
C27 C22 Rh1 C21 -124.1(4) . . . . ? 
C21 C22 Rh1 Cl1 145.47(14) . . . . ? 
C18 C22 Rh1 Cl1 -95.30(15) . . . . ? 
C27 C22 Rh1 Cl1 21.4(3) . . . . ? 
C22 C21 Rh1 C3 132.4(2) . . . . ? 
C20 C21 Rh1 C3 12.1(3) . . . . ? 
C26 C21 Rh1 C3 -103.3(3) . . . . ? 
C22 C21 Rh1 N2 -137.55(14) . . . . ? 
C20 C21 Rh1 N2 102.14(15) . . . . ? 
C26 C21 Rh1 N2 -13.3(3) . . . . ? 
C22 C21 Rh1 C18 37.92(15) . . . . ? 
C20 C21 Rh1 C18 -82.40(16) . . . . ? 
C26 C21 Rh1 C18 162.2(3) . . . . ? 
C22 C21 Rh1 C20 120.3(2) . . . . ? 
C26 C21 Rh1 C20 -115.4(3) . . . . ? 
C22 C21 Rh1 C19 81.15(16) . . . . ? 
C20 C21 Rh1 C19 -39.17(15) . . . . ? 
C26 C21 Rh1 C19 -154.6(3) . . . . ? 
C20 C21 Rh1 C22 -120.3(2) . . . . ? 
C26 C21 Rh1 C22 124.3(3) . . . . ? 
C22 C21 Rh1 Cl1 -42.17(17) . . . . ? 
C20 C21 Rh1 Cl1 -162.48(12) . . . . ? 
C26 C21 Rh1 Cl1 82.1(3) . . . . ? 
 
_diffrn_measured_fraction_theta_max    0.986 
_diffrn_reflns_theta_full              27.76 
_diffrn_measured_fraction_theta_full   0.986 
_refine_diff_density_max    0.747 
_refine_diff_density_min   -0.494 
_refine_diff_density_rms    0.063

##################################################END

data_3 
 
_audit_creation_method            SHELXL-97 
_chemical_name_systematic 
; 
 ? 
; 
_chemical_name_common             ? 
_chemical_melting_point           ? 
_chemical_formula_moiety          
'C28 H32 Cl N2 Rh' 
_chemical_formula_sum 
 'C28 H32 Cl N2 Rh' 
_chemical_formula_weight          534.92 
 
loop_ 
 _atom_type_symbol 
 _atom_type_description 
 _atom_type_scat_dispersion_real 
 _atom_type_scat_dispersion_imag 
 _atom_type_scat_source 
 'C'  'C'   0.0033   0.0016 
 'International Tables Vol C Tables 4.2.6.8 and 6.1.1.4' 
 'H'  'H'   0.0000   0.0000 
 'International Tables Vol C Tables 4.2.6.8 and 6.1.1.4' 
 'N'  'N'   0.0061   0.0033 
 'International Tables Vol C Tables 4.2.6.8 and 6.1.1.4' 
 'Cl'  'Cl'   0.1484   0.1585 
 'International Tables Vol C Tables 4.2.6.8 and 6.1.1.4' 
 'Rh'  'Rh'  -1.1178   0.9187 
 'International Tables Vol C Tables 4.2.6.8 and 6.1.1.4' 
 
_symmetry_cell_setting            'Triclinic'
_symmetry_space_group_name_H-M    'P -1' 
_symmetry_space_group_name_Hall   '-P 1'
loop_ 
 _symmetry_equiv_pos_as_xyz 
 'x, y, z' 
 '-x, -y, -z' 
 
_cell_length_a                    8.3652(2) 
_cell_length_b                    11.7625(3) 
_cell_length_c                    13.7771(4) 
_cell_angle_alpha                 100.1230(10) 
_cell_angle_beta                  99.7180(11) 
_cell_angle_gamma                 98.5780(10) 
_cell_volume                      1292.82(6) 
_cell_formula_units_Z             2 
_cell_measurement_temperature     296(2) 
_cell_measurement_reflns_used     9919 
_cell_measurement_theta_min       2.67 
_cell_measurement_theta_max       26.34 
 
_exptl_crystal_description        'Prism' 
_exptl_crystal_colour             'brown' 
_exptl_crystal_size_max           0.13 
_exptl_crystal_size_mid           0.11 
_exptl_crystal_size_min           0.08 
_exptl_crystal_density_meas       ? 
_exptl_crystal_density_diffrn     1.374 
_exptl_crystal_density_method     'not measured' 
_exptl_crystal_F_000              552 
_exptl_absorpt_coefficient_mu     0.781 
_exptl_absorpt_correction_type    'Multi-scan' 
_exptl_absorpt_correction_T_min   0.6801 
_exptl_absorpt_correction_T_max   0.7454  
_exptl_absorpt_process_details    
'SADABS-2008/1 - Bruker AXS area detector scaling and absorption correction'  
 
_exptl_special_details 
; 
 ? 
; 
 
_diffrn_ambient_temperature       296(2) 
_diffrn_radiation_wavelength      0.71073 
_diffrn_radiation_type            MoK\a 
_diffrn_radiation_source          'fine-focus sealed tube' 
_diffrn_radiation_monochromator   graphite 
_diffrn_measurement_device_type   'Bruker APEX-II CCD' 
_diffrn_measurement_method        '\f and \w scans' 
_diffrn_detector_area_resol_mean  ? 
_diffrn_standards_number          ? 
_diffrn_standards_interval_count  ? 
_diffrn_standards_interval_time   ? 
_diffrn_standards_decay_%         ? 
_diffrn_reflns_number             39128 
_diffrn_reflns_av_R_equivalents   0.0319 
_diffrn_reflns_av_sigmaI/netI     0.0215 
_diffrn_reflns_limit_h_min        -9 
_diffrn_reflns_limit_h_max        10 
_diffrn_reflns_limit_k_min        -14 
_diffrn_reflns_limit_k_max        12 
_diffrn_reflns_limit_l_min        -17 
_diffrn_reflns_limit_l_max        17 
_diffrn_reflns_theta_min          1.53 
_diffrn_reflns_theta_max          26.56 
_reflns_number_total              5411 
_reflns_number_gt                 4815 
_reflns_threshold_expression      >2sigma(I) 
 
_computing_data_collection        'Bruker APEX2' 
_computing_cell_refinement        'Bruker SAINT' 
_computing_data_reduction         'Bruker SAINT' 
_computing_structure_solution     'Sir-92 (Altomare et al., 1993)' 
_computing_structure_refinement   'SHELXL-97 (Sheldrick, 2008)' 
_computing_molecular_graphics     'Bruker SHELXTL' 
_computing_publication_material   'Bruker SHELXTL' 
 
_refine_special_details 
; 
 Refinement of F^2^ against ALL reflections.  The weighted R-factor wR and 
 goodness of fit S are based on F^2^, conventional R-factors R are based 
 on F, with F set to zero for negative F^2^. The threshold expression of 
 F^2^ > 2sigma(F^2^) is used only for calculating R-factors(gt) etc. and is 
 not relevant to the choice of reflections for refinement.  R-factors based 
 on F^2^ are statistically about twice as large as those based on F, and R- 
 factors based on ALL data will be even larger. 
; 
 
_refine_ls_structure_factor_coef  Fsqd  
_refine_ls_matrix_type            full 
_refine_ls_weighting_scheme       calc  
_refine_ls_weighting_details 
 'calc w=1/[\s^2^(Fo^2^)+(0.0380P)^2^+1.2193P] where P=(Fo^2^+2Fc^2^)/3' 
_atom_sites_solution_primary      direct 
_atom_sites_solution_secondary    difmap 
_atom_sites_solution_hydrogens    geom 
_refine_ls_hydrogen_treatment     none 
_refine_ls_extinction_method      none 
_refine_ls_extinction_coef        ? 
_refine_ls_number_reflns          5411 
_refine_ls_number_parameters      297 
_refine_ls_number_restraints      0 
_refine_ls_R_factor_all           0.0359 
_refine_ls_R_factor_gt            0.0306 
_refine_ls_wR_factor_ref          0.0795 
_refine_ls_wR_factor_gt           0.0746 
_refine_ls_goodness_of_fit_ref    1.014 
_refine_ls_restrained_S_all       1.014 
_refine_ls_shift/su_max           0.000 
_refine_ls_shift/su_mean          0.000 
 
loop_ 
 _atom_site_label 
 _atom_site_type_symbol 
 _atom_site_fract_x 
 _atom_site_fract_y 
 _atom_site_fract_z 
 _atom_site_U_iso_or_equiv 
 _atom_site_adp_type 
 _atom_site_occupancy 
 _atom_site_symmetry_multiplicity 
 _atom_site_calc_flag 
 _atom_site_refinement_flags 
 _atom_site_disorder_assembly 
 _atom_site_disorder_group 
C1 C 0.3119(3) 0.0386(2) 0.2924(2) 0.0439(6) Uani 1 1 d . . . 
C2 C 0.3650(4) 0.0005(3) 0.2041(2) 0.0573(8) Uani 1 1 d . . . 
H2 H 0.3658 0.0470 0.1561 0.069 Uiso 1 1 calc R . . 
C3 C 0.4171(5) -0.1071(3) 0.1870(3) 0.0703(10) Uani 1 1 d . . . 
C4 C 0.4755(7) -0.1405(5) 0.0942(4) 0.1078(17) Uani 1 1 d . . . 
C5 C 0.4198(5) -0.1781(3) 0.2566(3) 0.0736(11) Uani 1 1 d . . . 
H5 H 0.4530 -0.2503 0.2432 0.088 Uiso 1 1 calc R . . 
C6 C 0.3729(4) -0.1412(3) 0.3463(3) 0.0633(9) Uani 1 1 d . . . 
H8 H 0.3763 -0.1874 0.3946 0.076 Uiso 1 1 calc R . . 
C7 C 0.3201(3) -0.0333(2) 0.3639(2) 0.0472(6) Uani 1 1 d . . . 
C8 C 0.2846(3) 0.0182(3) 0.4588(2) 0.0472(6) Uani 1 1 d . . . 
H9 H 0.2896 -0.0207 0.5122 0.057 Uiso 1 1 calc R . . 
C9 C 0.2183(3) 0.1834(2) 0.55928(19) 0.0414(6) Uani 1 1 d . . . 
C10 C 0.1244(4) 0.1295(3) 0.6171(2) 0.0539(7) Uani 1 1 d . . . 
H10 H 0.0770 0.0503 0.5964 0.065 Uiso 1 1 calc R . . 
C11 C 0.1008(4) 0.1938(3) 0.7065(2) 0.0596(8) Uani 1 1 d . . . 
H11 H 0.0369 0.1562 0.7448 0.072 Uiso 1 1 calc R . . 
C12 C 0.1686(4) 0.3112(3) 0.7405(2) 0.0491(7) Uani 1 1 d . . . 
C13 C 0.1422(4) 0.3834(3) 0.8390(2) 0.0625(9) Uani 1 1 d . . . 
C14 C 0.0456(12) 0.4718(8) 0.8150(4) 0.235(6) Uani 1 1 d . . . 
H14A H -0.0129 0.4924 0.8678 0.352 Uiso 1 1 calc R . . 
H14B H -0.0318 0.4408 0.7527 0.352 Uiso 1 1 calc R . . 
H14C H 0.1180 0.5404 0.8088 0.352 Uiso 1 1 calc R . . 
C15 C 0.3070(6) 0.4377(5) 0.9068(3) 0.1076(17) Uani 1 1 d . . . 
H15A H 0.3654 0.4941 0.8766 0.161 Uiso 1 1 calc R . . 
H15B H 0.3704 0.3774 0.9162 0.161 Uiso 1 1 calc R . . 
H15C H 0.2902 0.4760 0.9708 0.161 Uiso 1 1 calc R . . 
C16 C 0.0548(8) 0.3054(6) 0.8986(4) 0.133(2) Uani 1 1 d . . . 
H16A H 0.0409 0.3527 0.9598 0.200 Uiso 1 1 calc R . . 
H16B H 0.1199 0.2479 0.9145 0.200 Uiso 1 1 calc R . . 
H16C H -0.0513 0.2663 0.8593 0.200 Uiso 1 1 calc R . . 
C17 C 0.2634(4) 0.3640(3) 0.6805(2) 0.0509(7) Uani 1 1 d . . . 
H17 H 0.3118 0.4431 0.7013 0.061 Uiso 1 1 calc R . . 
C18 C 0.2870(4) 0.3013(3) 0.5907(2) 0.0457(6) Uani 1 1 d . . . 
H18 H 0.3492 0.3386 0.5515 0.055 Uiso 1 1 calc R . . 
C19 C 0.0543(3) 0.3092(2) 0.3475(2) 0.0436(6) Uani 1 1 d . . . 
C20 C -0.0025(3) 0.2033(2) 0.2707(2) 0.0428(6) Uani 1 1 d . . . 
C21 C 0.0974(4) 0.2073(2) 0.19701(19) 0.0445(6) Uani 1 1 d . . . 
C22 C 0.2241(4) 0.3081(3) 0.2322(2) 0.0477(6) Uani 1 1 d . . . 
C23 C 0.1925(4) 0.3730(2) 0.3252(2) 0.0464(6) Uani 1 1 d . . . 
C24 C 0.2932(5) 0.4877(3) 0.3840(3) 0.0692(10) Uani 1 1 d . . . 
H24A H 0.2794 0.5477 0.3458 0.104 Uiso 1 1 calc R . . 
H24B H 0.4074 0.4810 0.3975 0.104 Uiso 1 1 calc R . . 
H24C H 0.2574 0.5081 0.4464 0.104 Uiso 1 1 calc R . . 
C25 C 0.3573(5) 0.3504(4) 0.1803(3) 0.0762(11) Uani 1 1 d . . . 
H25A H 0.3652 0.2886 0.1266 0.114 Uiso 1 1 calc R . . 
H25B H 0.4605 0.3728 0.2276 0.114 Uiso 1 1 calc R . . 
H25C H 0.3318 0.4169 0.1534 0.114 Uiso 1 1 calc R . . 
C26 C 0.0638(5) 0.1225(3) 0.0979(2) 0.0663(9) Uani 1 1 d . . . 
H26A H -0.0274 0.1394 0.0538 0.099 Uiso 1 1 calc R . . 
H26B H 0.0373 0.0438 0.1081 0.099 Uiso 1 1 calc R . . 
H26C H 0.1598 0.1301 0.0684 0.099 Uiso 1 1 calc R . . 
C27 C -0.1617(4) 0.1196(3) 0.2582(3) 0.0650(9) Uani 1 1 d . . . 
H27A H -0.2491 0.1474 0.2199 0.098 Uiso 1 1 calc R . . 
H27B H -0.1856 0.1145 0.3232 0.098 Uiso 1 1 calc R . . 
H27C H -0.1523 0.0434 0.2236 0.098 Uiso 1 1 calc R . . 
C28 C -0.0302(4) 0.3426(3) 0.4332(3) 0.0640(9) Uani 1 1 d . . . 
H28A H 0.0441 0.4013 0.4850 0.096 Uiso 1 1 calc R . . 
H28B H -0.0627 0.2746 0.4598 0.096 Uiso 1 1 calc R . . 
H28C H -0.1262 0.3735 0.4096 0.096 Uiso 1 1 calc R . . 
N1 N 0.2453(3) 0.12165(19) 0.46618(16) 0.0396(5) Uani 1 1 d . . . 
N2 N 0.5200(9) -0.1656(6) 0.0224(4) 0.177(3) Uani 1 1 d . . . 
Cl1 Cl 0.53673(8) 0.26480(8) 0.40330(6) 0.0590(2) Uani 1 1 d . . . 
Rh1 Rh 0.24835(2) 0.195111(16) 0.338716(14) 0.03431(8) Uani 1 1 d . . . 
 
loop_ 
 _atom_site_aniso_label 
 _atom_site_aniso_U_11 
 _atom_site_aniso_U_22 
 _atom_site_aniso_U_33 
 _atom_site_aniso_U_23 
 _atom_site_aniso_U_13 
 _atom_site_aniso_U_12 
C1 0.0392(14) 0.0476(15) 0.0403(14) -0.0027(12) 0.0033(11) 0.0125(12) 
C2 0.0619(19) 0.0632(19) 0.0485(17) 0.0006(14) 0.0135(14) 0.0271(16) 
C3 0.076(2) 0.073(2) 0.061(2) -0.0076(18) 0.0110(18) 0.039(2) 
C4 0.147(5) 0.112(4) 0.083(3) -0.001(3) 0.044(3) 0.080(4) 
C5 0.080(2) 0.061(2) 0.075(2) -0.0101(18) 0.0034(19) 0.0389(19) 
C6 0.066(2) 0.0547(18) 0.064(2) 0.0053(15) -0.0049(16) 0.0231(16) 
C7 0.0440(15) 0.0466(15) 0.0462(15) 0.0010(12) 0.0017(12) 0.0117(12) 
C8 0.0477(15) 0.0477(16) 0.0438(15) 0.0090(12) 0.0046(12) 0.0073(12) 
C9 0.0396(13) 0.0514(15) 0.0309(12) 0.0064(11) 0.0051(10) 0.0059(11) 
C10 0.0592(18) 0.0564(17) 0.0427(16) 0.0089(13) 0.0139(14) -0.0024(14) 
C11 0.0614(19) 0.077(2) 0.0414(16) 0.0150(15) 0.0203(14) 0.0010(16) 
C12 0.0458(15) 0.0705(19) 0.0317(13) 0.0082(13) 0.0077(11) 0.0154(14) 
C13 0.069(2) 0.086(2) 0.0362(15) 0.0058(15) 0.0149(14) 0.0271(18) 
C14 0.393(13) 0.326(11) 0.073(3) 0.042(5) 0.066(6) 0.316(11) 
C15 0.114(4) 0.134(4) 0.053(2) -0.023(3) 0.019(2) -0.001(3) 
C16 0.149(5) 0.166(5) 0.068(3) -0.019(3) 0.066(3) -0.025(4) 
C17 0.0559(17) 0.0533(17) 0.0390(15) 0.0001(12) 0.0103(13) 0.0063(13) 
C18 0.0499(15) 0.0496(15) 0.0377(14) 0.0067(12) 0.0156(12) 0.0039(12) 
C19 0.0400(14) 0.0431(14) 0.0458(15) 0.0021(11) 0.0051(11) 0.0139(11) 
C20 0.0373(13) 0.0401(14) 0.0464(15) 0.0045(11) -0.0005(11) 0.0084(11) 
C21 0.0534(16) 0.0436(14) 0.0327(13) 0.0035(11) -0.0002(12) 0.0117(12) 
C22 0.0556(17) 0.0461(15) 0.0400(14) 0.0106(12) 0.0090(13) 0.0031(13) 
C23 0.0518(16) 0.0347(13) 0.0460(15) 0.0017(11) 0.0014(12) 0.0045(12) 
C24 0.079(2) 0.0413(16) 0.072(2) -0.0009(15) -0.0032(19) -0.0030(16) 
C25 0.088(3) 0.082(3) 0.063(2) 0.0263(19) 0.031(2) -0.001(2) 
C26 0.085(2) 0.069(2) 0.0348(15) -0.0072(14) -0.0031(15) 0.0174(18) 
C27 0.0438(17) 0.0584(19) 0.086(3) 0.0105(17) 0.0044(16) 0.0009(14) 
C28 0.0480(17) 0.080(2) 0.063(2) -0.0041(17) 0.0150(15) 0.0271(16) 
N1 0.0372(11) 0.0438(12) 0.0342(11) 0.0030(9) 0.0056(9) 0.0034(9) 
N2 0.282(8) 0.183(5) 0.116(4) 0.016(4) 0.105(5) 0.147(6) 
Cl1 0.0333(3) 0.0783(5) 0.0568(4) -0.0031(4) 0.0099(3) 0.0020(3) 
Rh1 0.03233(11) 0.03821(12) 0.03022(11) 0.00019(8) 0.00777(8) 0.00611(8) 
 
_geom_special_details 
; 
 All esds (except the esd in the dihedral angle between two l.s. planes) 
 are estimated using the full covariance matrix.  The cell esds are taken 
 into account individually in the estimation of esds in distances, angles 
 and torsion angles; correlations between esds in cell parameters are only 
 used when they are defined by crystal symmetry.  An approximate (isotropic) 
 treatment of cell esds is used for estimating esds involving l.s. planes. 
; 
 
loop_ 
 _geom_bond_atom_site_label_1 
 _geom_bond_atom_site_label_2 
 _geom_bond_distance 
 _geom_bond_site_symmetry_2 
 _geom_bond_publ_flag 
C1 C2 1.388(4) . ? 
C1 C7 1.406(4) . ? 
C1 Rh1 2.018(3) . ? 
C2 C3 1.394(4) . ? 
C2 H2 0.9300 . ? 
C3 C5 1.378(6) . ? 
C3 C4 1.455(5) . ? 
C4 N2 1.121(6) . ? 
C5 C6 1.376(5) . ? 
C5 H5 0.9300 . ? 
C6 C7 1.400(4) . ? 
C6 H8 0.9300 . ? 
C7 C8 1.439(4) . ? 
C8 N1 1.299(4) . ? 
C8 H9 0.9300 . ? 
C9 C10 1.376(4) . ? 
C9 C18 1.381(4) . ? 
C9 N1 1.430(3) . ? 
C10 C11 1.388(4) . ? 
C10 H10 0.9300 . ? 
C11 C12 1.378(5) . ? 
C11 H11 0.9300 . ? 
C12 C17 1.398(4) . ? 
C12 C13 1.537(4) . ? 
C13 C14 1.457(6) . ? 
C13 C15 1.509(6) . ? 
C13 C16 1.523(6) . ? 
C14 H14A 0.9600 . ? 
C14 H14B 0.9600 . ? 
C14 H14C 0.9600 . ? 
C15 H15A 0.9600 . ? 
C15 H15B 0.9600 . ? 
C15 H15C 0.9600 . ? 
C16 H16A 0.9600 . ? 
C16 H16B 0.9600 . ? 
C16 H16C 0.9600 . ? 
C17 C18 1.385(4) . ? 
C17 H17 0.9300 . ? 
C18 H18 0.9300 . ? 
C19 C23 1.392(4) . ? 
C19 C20 1.445(4) . ? 
C19 C28 1.500(4) . ? 
C19 Rh1 2.260(3) . ? 
C20 C21 1.422(4) . ? 
C20 C27 1.498(4) . ? 
C20 Rh1 2.172(3) . ? 
C21 C22 1.419(4) . ? 
C21 C26 1.498(4) . ? 
C21 Rh1 2.178(3) . ? 
C22 C23 1.459(4) . ? 
C22 C25 1.492(4) . ? 
C22 Rh1 2.151(3) . ? 
C23 C24 1.493(4) . ? 
C23 Rh1 2.243(3) . ? 
C24 H24A 0.9600 . ? 
C24 H24B 0.9600 . ? 
C24 H24C 0.9600 . ? 
C25 H25A 0.9600 . ? 
C25 H25B 0.9600 . ? 
C25 H25C 0.9600 . ? 
C26 H26A 0.9600 . ? 
C26 H26B 0.9600 . ? 
C26 H26C 0.9600 . ? 
C27 H27A 0.9600 . ? 
C27 H27B 0.9600 . ? 
C27 H27C 0.9600 . ? 
C28 H28A 0.9600 . ? 
C28 H28B 0.9600 . ? 
C28 H28C 0.9600 . ? 
N1 Rh1 2.091(2) . ? 
Cl1 Rh1 2.3900(7) . ? 
 
loop_ 
 _geom_angle_atom_site_label_1 
 _geom_angle_atom_site_label_2 
 _geom_angle_atom_site_label_3 
 _geom_angle 
 _geom_angle_site_symmetry_1 
 _geom_angle_site_symmetry_3 
 _geom_angle_publ_flag 
C2 C1 C7 117.2(3) . . ? 
C2 C1 Rh1 127.6(2) . . ? 
C7 C1 Rh1 114.86(19) . . ? 
C1 C2 C3 120.4(3) . . ? 
C1 C2 H2 119.8 . . ? 
C3 C2 H2 119.8 . . ? 
C5 C3 C2 121.6(3) . . ? 
C5 C3 C4 120.7(3) . . ? 
C2 C3 C4 117.7(4) . . ? 
N2 C4 C3 179.6(6) . . ? 
C6 C5 C3 119.4(3) . . ? 
C6 C5 H5 120.3 . . ? 
C3 C5 H5 120.3 . . ? 
C5 C6 C7 119.3(3) . . ? 
C5 C6 H8 120.4 . . ? 
C7 C6 H8 120.4 . . ? 
C6 C7 C1 122.1(3) . . ? 
C6 C7 C8 123.3(3) . . ? 
C1 C7 C8 114.4(2) . . ? 
N1 C8 C7 116.7(3) . . ? 
N1 C8 H9 121.7 . . ? 
C7 C8 H9 121.7 . . ? 
C10 C9 C18 119.5(3) . . ? 
C10 C9 N1 122.1(3) . . ? 
C18 C9 N1 118.5(2) . . ? 
C9 C10 C11 119.8(3) . . ? 
C9 C10 H10 120.1 . . ? 
C11 C10 H10 120.1 . . ? 
C12 C11 C10 122.3(3) . . ? 
C12 C11 H11 118.9 . . ? 
C10 C11 H11 118.9 . . ? 
C11 C12 C17 116.9(3) . . ? 
C11 C12 C13 122.7(3) . . ? 
C17 C12 C13 120.4(3) . . ? 
C14 C13 C15 112.0(5) . . ? 
C14 C13 C16 110.2(5) . . ? 
C15 C13 C16 104.7(4) . . ? 
C14 C13 C12 108.9(3) . . ? 
C15 C13 C12 109.6(3) . . ? 
C16 C13 C12 111.4(3) . . ? 
C13 C14 H14A 109.5 . . ? 
C13 C14 H14B 109.5 . . ? 
H14A C14 H14B 109.5 . . ? 
C13 C14 H14C 109.5 . . ? 
H14A C14 H14C 109.5 . . ? 
H14B C14 H14C 109.5 . . ? 
C13 C15 H15A 109.5 . . ? 
C13 C15 H15B 109.5 . . ? 
H15A C15 H15B 109.5 . . ? 
C13 C15 H15C 109.5 . . ? 
H15A C15 H15C 109.5 . . ? 
H15B C15 H15C 109.5 . . ? 
C13 C16 H16A 109.5 . . ? 
C13 C16 H16B 109.5 . . ? 
H16A C16 H16B 109.5 . . ? 
C13 C16 H16C 109.5 . . ? 
H16A C16 H16C 109.5 . . ? 
H16B C16 H16C 109.5 . . ? 
C18 C17 C12 121.5(3) . . ? 
C18 C17 H17 119.3 . . ? 
C12 C17 H17 119.3 . . ? 
C9 C18 C17 120.1(3) . . ? 
C9 C18 H18 119.9 . . ? 
C17 C18 H18 119.9 . . ? 
C23 C19 C20 108.5(2) . . ? 
C23 C19 C28 127.6(3) . . ? 
C20 C19 C28 123.8(3) . . ? 
C23 C19 Rh1 71.33(16) . . ? 
C20 C19 Rh1 67.71(14) . . ? 
C28 C19 Rh1 128.4(2) . . ? 
C21 C20 C19 107.9(2) . . ? 
C21 C20 C27 125.3(3) . . ? 
C19 C20 C27 125.3(3) . . ? 
C21 C20 Rh1 71.15(15) . . ? 
C19 C20 Rh1 74.32(15) . . ? 
C27 C20 Rh1 131.1(2) . . ? 
C22 C21 C20 107.7(2) . . ? 
C22 C21 C26 127.6(3) . . ? 
C20 C21 C26 124.5(3) . . ? 
C22 C21 Rh1 69.82(15) . . ? 
C20 C21 Rh1 70.69(15) . . ? 
C26 C21 Rh1 127.9(2) . . ? 
C21 C22 C23 107.8(2) . . ? 
C21 C22 C25 127.6(3) . . ? 
C23 C22 C25 124.3(3) . . ? 
C21 C22 Rh1 71.92(16) . . ? 
C23 C22 Rh1 74.07(16) . . ? 
C25 C22 Rh1 124.7(2) . . ? 
C19 C23 C22 107.8(2) . . ? 
C19 C23 C24 127.4(3) . . ? 
C22 C23 C24 124.8(3) . . ? 
C19 C23 Rh1 72.68(16) . . ? 
C22 C23 Rh1 67.22(15) . . ? 
C24 C23 Rh1 125.5(2) . . ? 
C23 C24 H24A 109.5 . . ? 
C23 C24 H24B 109.5 . . ? 
H24A C24 H24B 109.5 . . ? 
C23 C24 H24C 109.5 . . ? 
H24A C24 H24C 109.5 . . ? 
H24B C24 H24C 109.5 . . ? 
C22 C25 H25A 109.5 . . ? 
C22 C25 H25B 109.5 . . ? 
H25A C25 H25B 109.5 . . ? 
C22 C25 H25C 109.5 . . ? 
H25A C25 H25C 109.5 . . ? 
H25B C25 H25C 109.5 . . ? 
C21 C26 H26A 109.5 . . ? 
C21 C26 H26B 109.5 . . ? 
H26A C26 H26B 109.5 . . ? 
C21 C26 H26C 109.5 . . ? 
H26A C26 H26C 109.5 . . ? 
H26B C26 H26C 109.5 . . ? 
C20 C27 H27A 109.5 . . ? 
C20 C27 H27B 109.5 . . ? 
H27A C27 H27B 109.5 . . ? 
C20 C27 H27C 109.5 . . ? 
H27A C27 H27C 109.5 . . ? 
H27B C27 H27C 109.5 . . ? 
C19 C28 H28A 109.5 . . ? 
C19 C28 H28B 109.5 . . ? 
H28A C28 H28B 109.5 . . ? 
C19 C28 H28C 109.5 . . ? 
H28A C28 H28C 109.5 . . ? 
H28B C28 H28C 109.5 . . ? 
C8 N1 C9 120.9(2) . . ? 
C8 N1 Rh1 115.39(18) . . ? 
C9 N1 Rh1 123.43(17) . . ? 
C1 Rh1 N1 78.66(10) . . ? 
C1 Rh1 C22 117.35(11) . . ? 
N1 Rh1 C22 163.87(10) . . ? 
C1 Rh1 C20 113.02(10) . . ? 
N1 Rh1 C20 109.29(10) . . ? 
C22 Rh1 C20 64.11(11) . . ? 
C1 Rh1 C21 98.15(10) . . ? 
N1 Rh1 C21 143.39(10) . . ? 
C22 Rh1 C21 38.26(11) . . ? 
C20 Rh1 C21 38.15(11) . . ? 
C1 Rh1 C23 156.01(11) . . ? 
N1 Rh1 C23 125.32(10) . . ? 
C22 Rh1 C23 38.71(11) . . ? 
C20 Rh1 C23 62.81(10) . . ? 
C21 Rh1 C23 63.44(10) . . ? 
C1 Rh1 C19 150.22(10) . . ? 
N1 Rh1 C19 102.51(10) . . ? 
C22 Rh1 C19 62.88(11) . . ? 
C20 Rh1 C19 37.98(10) . . ? 
C21 Rh1 C19 62.94(10) . . ? 
C23 Rh1 C19 35.99(11) . . ? 
C1 Rh1 Cl1 85.68(8) . . ? 
N1 Rh1 Cl1 86.81(6) . . ? 
C22 Rh1 Cl1 95.89(8) . . ? 
C20 Rh1 Cl1 156.97(8) . . ? 
C21 Rh1 Cl1 129.61(8) . . ? 
C23 Rh1 Cl1 94.58(8) . . ? 
C19 Rh1 Cl1 124.06(7) . . ? 
 
loop_ 
 _geom_torsion_atom_site_label_1 
 _geom_torsion_atom_site_label_2 
 _geom_torsion_atom_site_label_3 
 _geom_torsion_atom_site_label_4 
 _geom_torsion 
 _geom_torsion_site_symmetry_1 
 _geom_torsion_site_symmetry_2 
 _geom_torsion_site_symmetry_3 
 _geom_torsion_site_symmetry_4 
 _geom_torsion_publ_flag 
C7 C1 C2 C3 2.6(5) . . . . ? 
Rh1 C1 C2 C3 174.8(3) . . . . ? 
C1 C2 C3 C5 -0.8(6) . . . . ? 
C1 C2 C3 C4 -178.4(4) . . . . ? 
C2 C3 C5 C6 -1.2(6) . . . . ? 
C4 C3 C5 C6 176.2(4) . . . . ? 
C3 C5 C6 C7 1.3(5) . . . . ? 
C5 C6 C7 C1 0.6(5) . . . . ? 
C5 C6 C7 C8 -173.5(3) . . . . ? 
C2 C1 C7 C6 -2.5(4) . . . . ? 
Rh1 C1 C7 C6 -175.7(2) . . . . ? 
C2 C1 C7 C8 172.1(3) . . . . ? 
Rh1 C1 C7 C8 -1.1(3) . . . . ? 
C6 C7 C8 N1 176.4(3) . . . . ? 
C1 C7 C8 N1 1.9(4) . . . . ? 
C18 C9 C10 C11 -0.4(5) . . . . ? 
N1 C9 C10 C11 -179.4(3) . . . . ? 
C9 C10 C11 C12 -0.1(5) . . . . ? 
C10 C11 C12 C17 0.1(5) . . . . ? 
C10 C11 C12 C13 179.6(3) . . . . ? 
C11 C12 C13 C14 -113.7(6) . . . . ? 
C17 C12 C13 C14 65.8(6) . . . . ? 
C11 C12 C13 C15 123.5(4) . . . . ? 
C17 C12 C13 C15 -57.1(4) . . . . ? 
C11 C12 C13 C16 8.0(5) . . . . ? 
C17 C12 C13 C16 -172.5(4) . . . . ? 
C11 C12 C17 C18 0.4(4) . . . . ? 
C13 C12 C17 C18 -179.0(3) . . . . ? 
C10 C9 C18 C17 1.0(4) . . . . ? 
N1 C9 C18 C17 180.0(3) . . . . ? 
C12 C17 C18 C9 -1.0(5) . . . . ? 
C23 C19 C20 C21 -3.8(3) . . . . ? 
C28 C19 C20 C21 174.1(3) . . . . ? 
Rh1 C19 C20 C21 -63.67(18) . . . . ? 
C23 C19 C20 C27 -170.5(3) . . . . ? 
C28 C19 C20 C27 7.4(5) . . . . ? 
Rh1 C19 C20 C27 129.6(3) . . . . ? 
C23 C19 C20 Rh1 59.9(2) . . . . ? 
C28 C19 C20 Rh1 -122.2(3) . . . . ? 
C19 C20 C21 C22 5.5(3) . . . . ? 
C27 C20 C21 C22 172.2(3) . . . . ? 
Rh1 C20 C21 C22 -60.28(19) . . . . ? 
C19 C20 C21 C26 -170.9(3) . . . . ? 
C27 C20 C21 C26 -4.3(5) . . . . ? 
Rh1 C20 C21 C26 123.3(3) . . . . ? 
C19 C20 C21 Rh1 65.75(18) . . . . ? 
C27 C20 C21 Rh1 -127.6(3) . . . . ? 
C20 C21 C22 C23 -5.1(3) . . . . ? 
C26 C21 C22 C23 171.2(3) . . . . ? 
Rh1 C21 C22 C23 -65.9(2) . . . . ? 
C20 C21 C22 C25 -178.9(3) . . . . ? 
C26 C21 C22 C25 -2.7(5) . . . . ? 
Rh1 C21 C22 C25 120.2(4) . . . . ? 
C20 C21 C22 Rh1 60.83(19) . . . . ? 
C26 C21 C22 Rh1 -122.9(3) . . . . ? 
C20 C19 C23 C22 0.6(3) . . . . ? 
C28 C19 C23 C22 -177.1(3) . . . . ? 
Rh1 C19 C23 C22 58.28(19) . . . . ? 
C20 C19 C23 C24 -179.5(3) . . . . ? 
C28 C19 C23 C24 2.7(5) . . . . ? 
Rh1 C19 C23 C24 -121.8(3) . . . . ? 
C20 C19 C23 Rh1 -57.65(18) . . . . ? 
C28 C19 C23 Rh1 124.6(3) . . . . ? 
C21 C22 C23 C19 2.8(3) . . . . ? 
C25 C22 C23 C19 176.9(3) . . . . ? 
Rh1 C22 C23 C19 -61.7(2) . . . . ? 
C21 C22 C23 C24 -177.1(3) . . . . ? 
C25 C22 C23 C24 -3.0(5) . . . . ? 
Rh1 C22 C23 C24 118.4(3) . . . . ? 
C21 C22 C23 Rh1 64.49(19) . . . . ? 
C25 C22 C23 Rh1 -121.4(3) . . . . ? 
C7 C8 N1 C9 -175.9(2) . . . . ? 
C7 C8 N1 Rh1 -1.7(3) . . . . ? 
C10 C9 N1 C8 -45.6(4) . . . . ? 
C18 C9 N1 C8 135.4(3) . . . . ? 
C10 C9 N1 Rh1 140.7(2) . . . . ? 
C18 C9 N1 Rh1 -38.3(3) . . . . ? 
C2 C1 Rh1 N1 -172.1(3) . . . . ? 
C7 C1 Rh1 N1 0.2(2) . . . . ? 
C2 C1 Rh1 C22 9.9(3) . . . . ? 
C7 C1 Rh1 C22 -177.81(19) . . . . ? 
C2 C1 Rh1 C20 81.5(3) . . . . ? 
C7 C1 Rh1 C20 -106.1(2) . . . . ? 
C2 C1 Rh1 C21 44.9(3) . . . . ? 
C7 C1 Rh1 C21 -142.8(2) . . . . ? 
C2 C1 Rh1 C23 7.0(4) . . . . ? 
C7 C1 Rh1 C23 179.3(2) . . . . ? 
C2 C1 Rh1 C19 92.4(3) . . . . ? 
C7 C1 Rh1 C19 -95.2(3) . . . . ? 
C2 C1 Rh1 Cl1 -84.5(3) . . . . ? 
C7 C1 Rh1 Cl1 87.8(2) . . . . ? 
C8 N1 Rh1 C1 0.8(2) . . . . ? 
C9 N1 Rh1 C1 174.9(2) . . . . ? 
C8 N1 Rh1 C22 174.4(3) . . . . ? 
C9 N1 Rh1 C22 -11.5(4) . . . . ? 
C8 N1 Rh1 C20 111.5(2) . . . . ? 
C9 N1 Rh1 C20 -74.5(2) . . . . ? 
C8 N1 Rh1 C21 89.3(2) . . . . ? 
C9 N1 Rh1 C21 -96.7(2) . . . . ? 
C8 N1 Rh1 C23 -178.73(19) . . . . ? 
C9 N1 Rh1 C23 -4.7(2) . . . . ? 
C8 N1 Rh1 C19 150.4(2) . . . . ? 
C9 N1 Rh1 C19 -35.5(2) . . . . ? 
C8 N1 Rh1 Cl1 -85.38(19) . . . . ? 
C9 N1 Rh1 Cl1 88.67(19) . . . . ? 
C21 C22 Rh1 C1 66.5(2) . . . . ? 
C23 C22 Rh1 C1 -178.15(16) . . . . ? 
C25 C22 Rh1 C1 -57.1(3) . . . . ? 
C21 C22 Rh1 N1 -106.4(3) . . . . ? 
C23 C22 Rh1 N1 8.9(4) . . . . ? 
C25 C22 Rh1 N1 130.0(4) . . . . ? 
C21 C22 Rh1 C20 -37.24(16) . . . . ? 
C23 C22 Rh1 C20 78.07(17) . . . . ? 
C25 C22 Rh1 C20 -160.9(3) . . . . ? 
C23 C22 Rh1 C21 115.3(2) . . . . ? 
C25 C22 Rh1 C21 -123.7(3) . . . . ? 
C21 C22 Rh1 C23 -115.3(2) . . . . ? 
C25 C22 Rh1 C23 121.0(3) . . . . ? 
C21 C22 Rh1 C19 -79.85(18) . . . . ? 
C23 C22 Rh1 C19 35.45(16) . . . . ? 
C25 C22 Rh1 C19 156.5(3) . . . . ? 
C21 C22 Rh1 Cl1 154.71(15) . . . . ? 
C23 C22 Rh1 Cl1 -89.98(16) . . . . ? 
C25 C22 Rh1 Cl1 31.0(3) . . . . ? 
C21 C20 Rh1 C1 -73.06(18) . . . . ? 
C19 C20 Rh1 C1 171.23(16) . . . . ? 
C27 C20 Rh1 C1 47.8(3) . . . . ? 
C21 C20 Rh1 N1 -158.62(15) . . . . ? 
C19 C20 Rh1 N1 85.68(17) . . . . ? 
C27 C20 Rh1 N1 -37.8(3) . . . . ? 
C21 C20 Rh1 C22 37.34(16) . . . . ? 
C19 C20 Rh1 C22 -78.36(17) . . . . ? 
C27 C20 Rh1 C22 158.2(3) . . . . ? 
C19 C20 Rh1 C21 -115.7(2) . . . . ? 
C27 C20 Rh1 C21 120.8(3) . . . . ? 
C21 C20 Rh1 C23 80.80(17) . . . . ? 
C19 C20 Rh1 C23 -34.90(16) . . . . ? 
C27 C20 Rh1 C23 -158.4(3) . . . . ? 
C21 C20 Rh1 C19 115.7(2) . . . . ? 
C27 C20 Rh1 C19 -123.5(4) . . . . ? 
C21 C20 Rh1 Cl1 69.1(3) . . . . ? 
C19 C20 Rh1 Cl1 -46.6(3) . . . . ? 
C27 C20 Rh1 Cl1 -170.1(2) . . . . ? 
C22 C21 Rh1 C1 -124.60(18) . . . . ? 
C20 C21 Rh1 C1 117.19(17) . . . . ? 
C26 C21 Rh1 C1 -2.1(3) . . . . ? 
C22 C21 Rh1 N1 153.46(17) . . . . ? 
C20 C21 Rh1 N1 35.2(2) . . . . ? 
C26 C21 Rh1 N1 -84.0(3) . . . . ? 
C20 C21 Rh1 C22 -118.2(2) . . . . ? 
C26 C21 Rh1 C22 122.5(4) . . . . ? 
C22 C21 Rh1 C20 118.2(2) . . . . ? 
C26 C21 Rh1 C20 -119.3(4) . . . . ? 
C22 C21 Rh1 C23 39.20(17) . . . . ? 
C20 C21 Rh1 C23 -79.01(17) . . . . ? 
C26 C21 Rh1 C23 161.7(3) . . . . ? 
C22 C21 Rh1 C19 79.70(18) . . . . ? 
C20 C21 Rh1 C19 -38.51(15) . . . . ? 
C26 C21 Rh1 C19 -157.8(3) . . . . ? 
C22 C21 Rh1 Cl1 -33.5(2) . . . . ? 
C20 C21 Rh1 Cl1 -151.68(13) . . . . ? 
C26 C21 Rh1 Cl1 89.1(3) . . . . ? 
C19 C23 Rh1 C1 122.6(3) . . . . ? 
C22 C23 Rh1 C1 4.1(3) . . . . ? 
C24 C23 Rh1 C1 -113.4(3) . . . . ? 
C19 C23 Rh1 N1 -58.42(19) . . . . ? 
C22 C23 Rh1 N1 -176.96(15) . . . . ? 
C24 C23 Rh1 N1 65.6(3) . . . . ? 
C19 C23 Rh1 C22 118.5(2) . . . . ? 
C24 C23 Rh1 C22 -117.5(4) . . . . ? 
C19 C23 Rh1 C20 36.81(16) . . . . ? 
C22 C23 Rh1 C20 -81.73(18) . . . . ? 
C24 C23 Rh1 C20 160.8(3) . . . . ? 
C19 C23 Rh1 C21 79.79(18) . . . . ? 
C22 C23 Rh1 C21 -38.75(17) . . . . ? 
C24 C23 Rh1 C21 -156.2(3) . . . . ? 
C22 C23 Rh1 C19 -118.5(2) . . . . ? 
C24 C23 Rh1 C19 124.0(4) . . . . ? 
C19 C23 Rh1 Cl1 -147.75(15) . . . . ? 
C22 C23 Rh1 Cl1 93.70(16) . . . . ? 
C24 C23 Rh1 Cl1 -23.8(3) . . . . ? 
C23 C19 Rh1 C1 -136.4(2) . . . . ? 
C20 C19 Rh1 C1 -16.4(3) . . . . ? 
C28 C19 Rh1 C1 99.9(3) . . . . ? 
C23 C19 Rh1 N1 134.60(16) . . . . ? 
C20 C19 Rh1 N1 -105.40(16) . . . . ? 
C28 C19 Rh1 N1 10.9(3) . . . . ? 
C23 C19 Rh1 C22 -38.11(16) . . . . ? 
C20 C19 Rh1 C22 81.89(18) . . . . ? 
C28 C19 Rh1 C22 -161.8(3) . . . . ? 
C23 C19 Rh1 C20 -120.0(2) . . . . ? 
C28 C19 Rh1 C20 116.3(3) . . . . ? 
C23 C19 Rh1 C21 -81.31(18) . . . . ? 
C20 C19 Rh1 C21 38.69(16) . . . . ? 
C28 C19 Rh1 C21 155.0(3) . . . . ? 
C20 C19 Rh1 C23 120.0(2) . . . . ? 
C28 C19 Rh1 C23 -123.7(3) . . . . ? 
C23 C19 Rh1 Cl1 39.94(19) . . . . ? 
C20 C19 Rh1 Cl1 159.94(14) . . . . ? 
C28 C19 Rh1 Cl1 -83.8(3) . . . . ? 
 
_diffrn_measured_fraction_theta_max    0.982 
_diffrn_reflns_theta_full              26.56 
_diffrn_measured_fraction_theta_full   0.982 
_refine_diff_density_max    0.452 
_refine_diff_density_min   -0.339 
_refine_diff_density_rms    0.061
 
############################################################END
